# Supplementary material for: N 1-Selective alkenylation of 1-sulfonyl-1,2,3-triazoles with alkynes via gold catalysis
Source: Royal Society of Chemistry journal article supplement (doi:10.1039/c7ob00142h), 2017-01-01

**Supporting Information**  
**for**  
***N*<sup>1</sup>-Selective alkenylation of 1-sulfonyl-1,2,3-trizoles with**  
**alkyne via gold catalysis**

Chenyang Sun, Xiao Yuan, Yan Li, Xiaoxiao Li\* and Zhigang Zhao\*

College of Chemistry and Environmental Protection Engineering, Southwest  
University for Nationalities, Chengdu 610041, PR China

[lixiaoxiao.2005@163.com](mailto:lixiaoxiao.2005@163.com) ; [zzg63129@163.com](mailto:zzg63129@163.com)

**Table of Contents**

|                                                         |         |
|---------------------------------------------------------|---------|
| 1. General information and experimental procedures..... | S2      |
| 2. Spectral Data.....                                   | S3-S10  |
| 3. References.....                                      | S10     |
| 4. Deuterium-Labeling Experiment Result.....            | S11     |
| 5. <sup>1</sup> H and <sup>13</sup> C NMR Spectra.....  | S12-S32 |

## 1. General information

All reactions were performed using Schlenk tubes, septa, and syringes without protection of nitrogen. THF, toluene and DCM, DCE were freshly distilled over sodium/benzophenone and calcium hydride, respectively. Commercial reagents were used as supplied or were purified by standard techniques where necessary. Column chromatography was performed using Qingdao Haiyang Chemical Co., Ltd silica gel (200–300 mesh) with the appropriate solvent system, as determined by TLC analysis (Qingdao Haiyang Chemical Co., Ltd, silica gel F254) using UV light and KMnO<sub>4</sub> stain to visualize the reaction components. Melting points were determined using a WRS-1B digital melting point instrument. IR spectra were recorded on a Nicoletisso FTIR spectrometer using KBr disks. Unless otherwise noted, nuclear magnetic resonance spectra were recorded at room temperature on an Agilent 400 MHz spectrometer using CDCl<sub>3</sub> as the solvent and TMS as the internal reference. Chemical shifts for <sup>13</sup>C NMR spectra were recorded in parts per million relative to tetramethylsilane using the central peak of deuteriochloroform (77.0 ppm) as the internal standard. HRMS was performed using a Bruker Daltonics Bio TOF mass spectrometer.

1-Sulfonyl-1,2,3-triazoles **1a-1j** were prepared according to the published methods.<sup>1</sup> Alkyne were obtained commercially and used without further purification.

### **General procedure for *N*-Selective gold-catalyzed alkenylation of 4-phenyl-1-sulfonyl-1,2,3-triazole **1a** with phenylacetylene **2a**.**

To a Schlenk tube charged with nitrogen was added IPrAuCl/AgOTf (5 mol%) in dry DCE (3 mL). After three minutes, 4-phenyl-1-sulfonyl-1,2,3-triazole **1a** (0.1 mmol), phenylacetylene **2a** (0.5 mmol) and H<sub>2</sub>O (0.2 mmol) were added to the reaction. Then the reaction mixture was stirred at 80 °C for 12 h until complete consumption of starting material as monitored by TLC. Concentration of the reaction mixture in vacuo followed by purification through flash chromatography on silica gel column (hexane/EtOAc = 30/1) afforded **3a** (22.8 mg, 92% yield) as yellow oily liquid.

## 2. Spectral Data

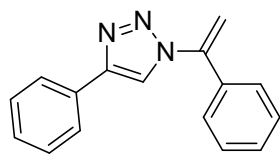

### 4-phenyl-1-(1-phenylvinyl)-1H-1,2,3-triazole (**3a**)

Yellow oily liquid; yield, 92% (22.8 mg); IR (neat) 3038, 2934, 1496, 1459, 756  $\text{cm}^{-1}$ ;  $^1\text{H}$  NMR (400 MHz,  $\text{CDCl}_3$ )  $\delta$  7.84 (d,  $J = 7.6$  Hz, 2H), 7.79 (s, 1H), 7.43 – 7.21 (m, 8H), 5.85 (s, 1H), 5.54 (s, 1H);  $^{13}\text{C}$  NMR (100 MHz,  $\text{CDCl}_3$ )  $\delta$  147.48, 142.86, 134.51, 130.09, 129.83, 128.80, 128.79, 128.27, 127.26, 125.71, 119.78, 109.37; HRMS (ESI) calcd for  $\text{C}_{16}\text{H}_{14}\text{N}_3^+$   $[\text{M}+\text{H}]^+$  248.1182; found, 248.1182.

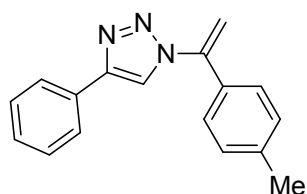

### 4-phenyl-1-(1-(*p*-tolyl)vinyl)-1H-1,2,3-triazole (**3b**)

Yellow oily liquid; yield, 88% (23.0 mg); IR (neat) 3038, 2937, 1499, 1457, 756  $\text{cm}^{-1}$ ;  $^1\text{H}$  NMR (400 MHz,  $\text{CDCl}_3$ )  $\delta$  7.84 (d,  $J = 7.2$  Hz, 2H), 7.80 (s, 1H), 7.41 (t,  $J = 7.5$  Hz, 2H), 7.33 (t,  $J = 7.4$  Hz, 1H), 7.24 (q,  $J = 8.0$  Hz, 4H), 5.80 (s, 1H), 5.50 (s, 1H), 2.39 (s, 3H);  $^{13}\text{C}$  NMR (101 MHz,  $\text{CDCl}_3$ )  $\delta$  147.39, 142.85, 140.04, 131.69, 130.12, 129.47, 128.78, 128.25, 127.18, 125.71, 119.80, 108.58, 21.24; HRMS (ESI) calcd for  $\text{C}_{17}\text{H}_{16}\text{N}_3^+$   $[\text{M}+\text{H}]^+$  262.1339; found, 262.1339.

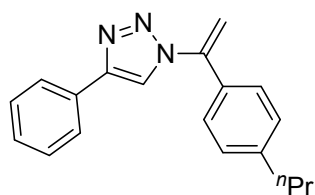

### 4-phenyl-1-(1-(4-propylphenyl)vinyl)-1H-1,2,3-triazole (**3c**)

Yellow oily liquid; yield, 86% (24.9 mg); IR (neat) 3038, 2937, 1496, 1460, 762  $\text{cm}^{-1}$ ;  $^1\text{H}$  NMR (400 MHz,  $\text{CDCl}_3$ )  $\delta$  7.85 (d,  $J = 7.1$  Hz, 2H), 7.81 (s, 1H), 7.42 (t,  $J = 7.5$  Hz, 2H), 7.33 (t,  $J = 7.4$  Hz, 1H), 7.28 (d,  $J = 8.2$  Hz, 2H), 7.22 (d,  $J = 8.2$  Hz, 2H), 5.80 (s, 1H), 5.51 (s, 1H), 2.65 – 2.60 (m, 2H), 1.71 – 1.62 (m, 2H), 0.97 (t,  $J = 7.3$  Hz, 3H).  $^{13}\text{C}$  NMR (100 MHz,  $\text{CDCl}_3$ )  $\delta$  147.42, 144.82, 142.92, 131.92, 130.18, 128.88, 128.78, 128.24, 127.16, 125.74, 119.84, 108.64, 37.72, 24.32, 13.77. HRMS (ESI) calcd for  $\text{C}_{19}\text{H}_{20}\text{N}_3^+$   $[\text{M}+\text{H}]^+$  290.1652; found, 290.1652.

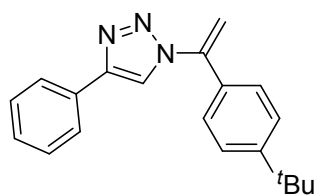

1-(1-(4-(*tert*-butyl)phenyl)vinyl)-4-phenyl-1*H*-1,2,3-triazole (**3d**)

Yellow oily liquid; yield, 88% (26.7 mg); IR (neat) 3041, 2937, 1502, 1457, 756  $\text{cm}^{-1}$ ;  $^1\text{H}$  NMR (400 MHz,  $\text{CDCl}_3$ )  $\delta$  7.85 (d,  $J = 7.6$  Hz, 2H), 7.81 (s, 1H), 7.45 – 7.40 (m, 4H), 7.35 – 7.30 (m, 3H), 5.82 (s, 1H), 5.52 (s, 1H), 1.35 (s, 9H);  $^{13}\text{C}$  NMR (100 MHz,  $\text{CDCl}_3$ )  $\delta$  153.22, 147.48, 142.86, 131.68, 130.24, 128.81, 128.26, 127.04, 125.79, 125.78, 119.86, 108.69, 34.78, 31.18; HRMS (ESI) calcd for  $\text{C}_{20}\text{H}_{22}\text{N}_3^+$   $[\text{M}+\text{H}]^+$  304.1808; found, 304.1807.

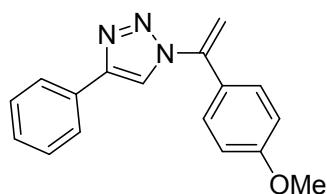

1-(1-(4-methoxyphenyl)vinyl)-4-phenyl-1*H*-1,2,3-triazole (**3e**)

Yellow oily liquid; yield, 78% (21.6 mg); IR (neat) 3035, 2931, 1499, 1457, 759  $\text{cm}^{-1}$ ;  $^1\text{H}$  NMR (400 MHz,  $\text{CDCl}_3$ )  $\delta$  8.01 (s, 1H), 7.85 (d,  $J = 7.2$  Hz, 2H), 7.46 – 7.36 (m, 5H), 6.94 (d,  $J = 8.8$  Hz, 2H), 5.87 (s, 1H), 5.33 (s, 1H), 3.85 (s, 3H);  $^{13}\text{C}$  NMR (100 MHz,  $\text{CDCl}_3$ )  $\delta$  160.40, 148.56, 145.75, 132.32, 129.92, 129.63, 128.88, 128.80, 127.20, 126.18, 113.71, 110.00, 105.98, 55.34; HRMS (ESI) calcd for  $\text{C}_{17}\text{H}_{16}\text{N}_3\text{O}^+$   $[\text{M}+\text{H}]^+$  278.1288; found, 278.1288.

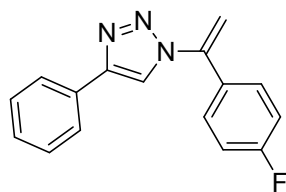

1-(1-(4-fluorophenyl)vinyl)-4-phenyl-1*H*-1,2,3-triazole (**3f**)

Yellow oily liquid; yield, 63% (16.7 mg); IR (neat) 3035, 2937, 1499, 1457, 758  $\text{cm}^{-1}$ ;  $^1\text{H}$  NMR (400 MHz,  $\text{CDCl}_3$ )  $\delta$  7.85 (d,  $J = 7.3$  Hz, 2H), 7.81 (s, 1H), 7.43 (t,  $J = 7.5$  Hz, 2H), 7.39 – 7.33 (m, 3H), 7.12 (t,  $J = 8.6$  Hz, 2H), 5.82 (s, 1H), 5.52 (s, 1H);  $^{13}\text{C}$  NMR (100 MHz,  $\text{CDCl}_3$ )  $\delta$  163.55 (d,  $J = 249.2$  Hz), 147.63, 142.02, 129.94 (d,  $J = 4.8$  Hz), 129.32 (d,  $J = 8.4$  Hz), 128.86, 128.42, 127.94, 125.78, 119.69, 115.95 (d,  $J = 21.8$  Hz), 109.28; HRMS (ESI) calcd for  $\text{C}_{16}\text{H}_{13}\text{FN}_3^+$   $[\text{M}+\text{H}]^+$  266.1088; found, 266.1089.

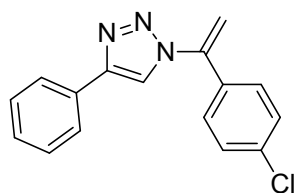

1-(1-(4-chlorophenyl)vinyl)-4-phenyl-1*H*-1,2,3-triazole (**3g**)

White solid; M p, 109.7 – 111.6 °C; yield, 75% (21.1 mg); IR (neat) 3038, 2934, 1496, 1454, 762 cm<sup>-1</sup>; <sup>1</sup>H NMR (400 MHz, CDCl<sub>3</sub>) δ 7.85 (d, *J* = 7.7 Hz, 2H), 7.81 (s, 1H), 7.45 – 7.39 (m, 4H), 7.37 – 7.31 (m, 3H), 5.84 (s, 1H), 5.56 (s, 1H); <sup>13</sup>C NMR (100 MHz, CDCl<sub>3</sub>) δ 147.73, 142.01, 135.97, 133.01, 129.98, 129.10, 128.87, 128.63, 128.43, 125.78, 119.66, 109.78; HRMS (ESI) calcd for C<sub>16</sub>H<sub>13</sub>ClN<sub>3</sub><sup>+</sup> [M+H]<sup>+</sup> 282.0793; found, 282.0793.

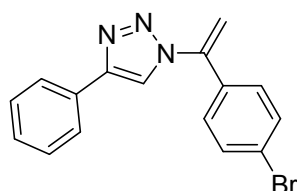

1-(1-(4-bromophenyl)vinyl)-4-phenyl-1*H*-1,2,3-triazole (**3h**)

Yellow oily liquid; yield, 81% (26.3 mg); IR (neat) 3038, 2935, 1496, 1460, 762 cm<sup>-1</sup>; <sup>1</sup>H NMR (400 MHz, CDCl<sub>3</sub>) δ 7.85 (d, *J* = 7.1 Hz, 2H), 7.81 (s, 1H), 7.57 (d, *J* = 8.5 Hz, 2H), 7.44 (t, *J* = 7.4 Hz, 2H), 7.36 (t, *J* = 7.4 Hz, 1H), 7.25 (d, *J* = 6.4 Hz, 2H), 5.86 (s, 1H), 5.57 (s, 1H); <sup>13</sup>C NMR (100 MHz, CDCl<sub>3</sub>) δ 147.77, 142.09, 133.49, 132.09, 129.98, 128.88, 128.45, 125.79, 124.24, 119.64, 109.99, 109.84; HRMS (ESI) calcd for C<sub>16</sub>H<sub>13</sub>BrN<sub>3</sub><sup>+</sup> [M+H]<sup>+</sup> 326.0287; found, 326.0287.

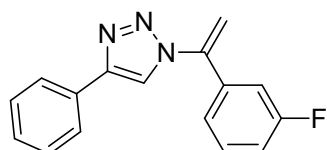

1-(1-(3-fluorophenyl)vinyl)-4-phenyl-1*H*-1,2,3-triazole (**3i**)

Yellow oily liquid; yield, 25% (6.7 mg); IR (neat) 3035, 2934, 1501, 758, 702 cm<sup>-1</sup>; <sup>1</sup>H NMR (400 MHz, CDCl<sub>3</sub>) δ 7.86 (d, *J* = 7.3 Hz, 2H), 7.82 (s, 1H), 7.44 (t, *J* = 7.5 Hz, 2H), 7.40 – 7.34 (m, 2H), 7.19 – 7.07 (m, 3H), 5.88 (s, 1H), 5.61 (s, 1H); <sup>13</sup>C NMR (100 MHz, CDCl<sub>3</sub>) δ 162.76 (d, *J* = 274.3 Hz), 147.65, 141.80, 130.53 (d, *J* = 8.3 Hz), 128.88, 128.45, 125.82, 123.02 (d, *J* = 3.1 Hz), 119.72, 116.92 (d, *J* = 21.1 Hz), 114.44 (d, *J* = 23.1 Hz), 110.48; HRMS (ESI) calcd for C<sub>16</sub>H<sub>13</sub>FN<sub>3</sub><sup>+</sup> [M+H]<sup>+</sup> 266.1088; found, 266.1088.

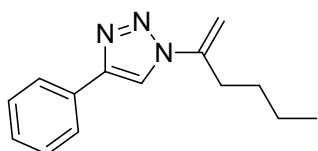

**1-(hex-1-en-2-yl)-4-phenyl-1H-1,2,3-triazole (3j)**

White solid; M p, 78.8 – 79.9 °C; yield, 64% (24.9 mg); IR (neat) 3038, 2934, 1499, 1459, 702 cm<sup>-1</sup>; <sup>1</sup>H NMR (400 MHz, CDCl<sub>3</sub>) δ 7.97 (s, 1H), 7.87 (d, *J* = 7.4 Hz, 2H), 7.44 (t, *J* = 7.5 Hz, 2H), 7.35 (t, *J* = 7.4 Hz, 1H), 5.47 (s, 1H), 5.01 (s, 1H), 2.79 (t, *J* = 7.6 Hz, 2H), 1.62 – 1.54 (m, 2H), 1.47 – 1.38 (m, 2H), 0.94 (t, *J* = 7.3 Hz, 3H); <sup>13</sup>C NMR (100 MHz, CDCl<sub>3</sub>) δ 147.48, 143.87, 130.24, 128.85, 128.31, 125.79, 117.28, 109.99, 104.00, 32.58, 29.16, 22.12, 13.79; HRMS (ESI) calcd for C<sub>14</sub>H<sub>18</sub>N<sub>3</sub><sup>+</sup> [M+H]<sup>+</sup> 228.1495; found, 228.1498.

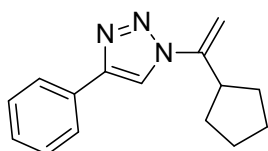

**1-(1-cyclopentylvinyl)-4-phenyl-1H-1,2,3-triazole (3k)**

White solid; M p, 56.9 – 57.8 °C; yield, 80% (19.2 mg); IR (neat) 3041, 2934, 1608, 1499, 756 cm<sup>-1</sup>; <sup>1</sup>H NMR (400 MHz, CDCl<sub>3</sub>) δ 7.97 (s, 1H), 7.87 (d, *J* = 7.2 Hz, 2H), 7.43 (t, *J* = 7.5 Hz, 2H), 7.34 (t, *J* = 7.4 Hz, 1H), 5.44 (s, 1H), 5.07 (s, 1H), 3.38 – 3.28 (m, 1H), 2.06 – 2.02 (m, 2H), 1.80 – 1.73 (m, 2H), 1.72 – 1.63 (m, 2H), 1.61 – 1.51 (m, 2H); <sup>13</sup>C NMR (100 MHz, CDCl<sub>3</sub>) δ 147.63, 147.20, 130.31, 128.78, 128.17, 125.69, 117.85, 103.04, 42.45, 31.18, 24.72; HRMS (ESI) calcd for C<sub>15</sub>H<sub>18</sub>N<sub>3</sub><sup>+</sup> [M+H]<sup>+</sup> 240.1495; found, 240.1493.

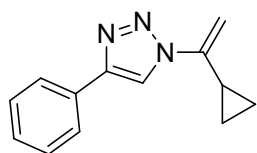

**1-(1-cyclopropylvinyl)-4-phenyl-1H-1,2,3-triazole (3l)**

Yellow oily liquid; yield, 64% (13.5 mg); IR (neat) 3041, 2934, 1605, 1501, 1457, 761 cm<sup>-1</sup>; <sup>1</sup>H NMR (400 MHz, CDCl<sub>3</sub>) δ 8.07 (s, 1H), 7.81 (d, *J* = 6.8 Hz, 2H), 7.38 (t, *J* = 7.2 Hz, 2H), 7.28 (t, *J* = 7.3 Hz, 1H), 5.67 (s, 1H), 4.89 (s, 1H), 1.86 – 1.79 (m, 1H), 0.95 – 0.90 (m, 2H), 0.73 – 0.70 (m, 2H); <sup>13</sup>C NMR (100 MHz, CDCl<sub>3</sub>) δ 130.32, 128.82, 128.22, 125.72, 117.32, 109.97, 102.91, 13.39, 6.44; HRMS (ESI) calcd for C<sub>13</sub>H<sub>14</sub>N<sub>3</sub><sup>+</sup> [M+H]<sup>+</sup> 212.1182; found, 212.1182.

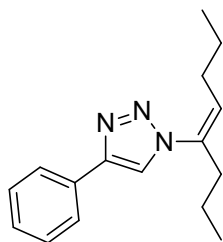

**(Z)-1-(oct-4-en-4-yl)-4-phenyl-1H-1,2,3-triazole (3m)<sup>2</sup>**

Yellow oily liquid; yield, 58% (14.7 mg); IR (neat) 3061, 2974, 2381, 1429, 768  $\text{cm}^{-1}$ ;  $^1\text{H}$  NMR (400 MHz,  $\text{CDCl}_3$ )  $\delta$  7.81 (d,  $J = 7.7$  Hz, 2H), 7.68 (s, 1H), 7.37 (t,  $J = 7.5$  Hz, 2H), 7.27 (t,  $J = 7.3$  Hz, 1H), 5.54 (t,  $J = 7.4$  Hz, 1H), 2.46 (t,  $J = 7.3$  Hz, 2H), 1.89 (q,  $J = 7.2$  Hz, 2H), 1.38 – 1.30 (m, 4H), 0.87 – 0.83 (m, 3H), 0.83 – 0.79 (m, 3H).  $^{13}\text{C}$  NMR (100 MHz,  $\text{CDCl}_3$ )  $\delta$  146.85, 136.00, 130.46, 128.82, 128.12, 127.31, 125.66, 120.21, 109.97, 38.10, 29.16, 22.49, 20.12, 13.68, 13.26.

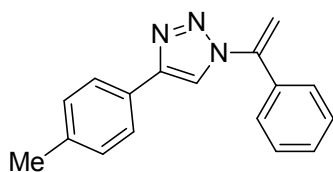

**1-(1-phenylvinyl)-4-(p-tolyl)-1H-1,2,3-triazole (4b)**

Yellow oily liquid; yield, 67% (17.5 mg); IR (neat) 3041, 2934, 1501, 1457, 759  $\text{cm}^{-1}$ ;  $^1\text{H}$  NMR (400 MHz,  $\text{CDCl}_3$ )  $\delta$  7.75 (d,  $J = 3.3$  Hz, 2H), 7.72 (s, 1H), 7.47 – 7.34 (m, 5H), 7.22 (d,  $J = 7.6$  Hz, 2H), 5.84 (s, 1H), 5.53 (s, 1H);  $^{13}\text{C}$  NMR (100 MHz,  $\text{CDCl}_3$ )  $\delta$  147.60, 142.94, 138.15, 134.60, 129.81, 129.48, 128.79, 127.30, 125.65, 119.43, 109.26, 21.24; HRMS (ESI) calcd for  $\text{C}_{17}\text{H}_{16}\text{N}_3^+$   $[\text{M}+\text{H}]^+$  262.1339; found, 262.1339.

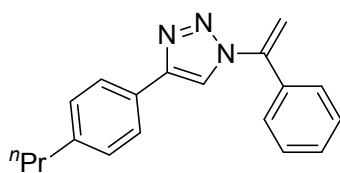

**1-(1-phenylvinyl)-4-(4-propylphenyl)-1H-1,2,3-triazole (4c)**

Yellow oily liquid; yield, 84% (24.4 mg); IR (neat) 3035, 2934, 1496, 1457, 703  $\text{cm}^{-1}$ ;  $^1\text{H}$  NMR (400 MHz,  $\text{CDCl}_3$ )  $\delta$  7.80 – 7.77 (m, 2H), 7.76 (s, 1H), 7.44 – 7.42 (m, 3H), 7.39 – 7.37 (m, =2H), 7.26 – 7.24 (m, 2H), 5.88 (s, 1H), 5.56 (s, 1H), 2.61 (t,  $J = 7.5$  Hz, 2H), 1.71 – 1.61 (m, 2H), 0.95 (t,  $J = 7.3$  Hz, 3H);  $^{13}\text{C}$  NMR (100 MHz,  $\text{CDCl}_3$ )  $\delta$  143.25, 142.94, 134.53, 129.92, 129.00, 128.88, 127.84, 127.36, 125.78, 119.60, 110.00, 109.55, 37.81, 24.44, 13.76; HRMS (ESI) calcd for  $\text{C}_{19}\text{H}_{20}\text{N}_3^+$   $[\text{M}+\text{H}]^+$  290.1652; found, 290.1652.

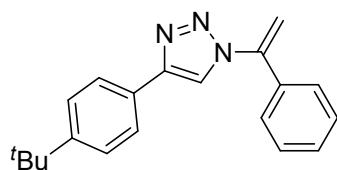

**4-(4-(*tert*-butyl)phenyl)-1-(1-phenylvinyl)-1*H*-1,2,3-triazole (4d)**

Yellow oily liquid; yield, 75% (23.1 mg); IR (neat) 3038, 2937, 1499, 1454, 758, 700  $\text{cm}^{-1}$ ;  $^1\text{H}$  NMR (400 MHz,  $\text{CDCl}_3$ )  $\delta$  7.79 – 7.77 (m, 3H), 7.51 – 7.31 (m, 7H), 5.85 (s, 1H), 5.54 (s, 1H), 1.34 (s, 9H);  $^{13}\text{C}$  NMR (100 MHz,  $\text{CDCl}_3$ )  $\delta$  151.43, 147.53, 142.93, 134.63, 129.82, 128.80, 127.30, 125.73, 125.50, 119.50, 109.29, 34.63, 31.23; HRMS (ESI) calcd for  $\text{C}_{20}\text{H}_{22}\text{N}_3^+$   $[\text{M}+\text{H}]^+$  304.1808; found, 304.1807.

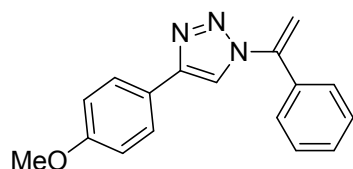

**4-(4-methoxyphenyl)-1-(1-phenylvinyl)-1*H*-1,2,3-triazole (4e)**

Yellow oily liquid; yield, 47% (13.3 mg); IR (neat) 3038, 2932, 1628, 1499, 756  $\text{cm}^{-1}$ ;  $^1\text{H}$  NMR (400 MHz,  $\text{CDCl}_3$ )  $\delta$  7.78 (d,  $J = 8.8$  Hz, 2H), 7.72 (s, 1H), 7.49 – 7.40 (m, 3H), 7.39 – 7.37 (m, 2H), 6.96 (d,  $J = 7.8$  Hz, 2H), 5.86 (s, 1H), 5.55 (s, 1H), 3.85 (s, 3H);  $^{13}\text{C}$  NMR (100 MHz,  $\text{CDCl}_3$ )  $\delta$  159.82, 142.98, 134.58, 129.91, 128.87, 127.38, 127.20, 122.58, 119.06, 114.30, 110.01, 109.45, 55.33; HRMS (ESI) calcd for  $\text{C}_{17}\text{H}_{16}\text{N}_3\text{O}^+$   $[\text{M}+\text{H}]^+$  278.1288; found, 278.1287.

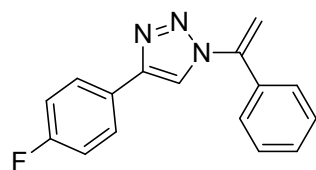

**4-(4-fluorophenyl)-1-(1-phenylvinyl)-1*H*-1,2,3-triazole (4f)**

Yellow oily liquid; yield, 64% (17.1 mg); IR (neat) 3035, 2934, 1499, 1457, 761  $\text{cm}^{-1}$ ;  $^1\text{H}$  NMR (400 MHz,  $\text{CDCl}_3$ )  $\delta$  7.86 – 7.78 (m, 2H), 7.76 (s, 1H), 7.48 – 7.39 (m, 3H), 7.38 – 7.36 (m, 2H), 7.11 (t,  $J = 8.6$  Hz, 2H), 5.85 (s, 1H), 5.55 (s, 1H);  $^{13}\text{C}$  NMR (100 MHz,  $\text{CDCl}_3$ )  $\delta$  162.69 (d,  $J = 246.1$  Hz), 146.67, 142.88, 134.49, 129.89, 128.84, 127.50 (d,  $J = 8.2$  Hz), 127.29, 126.38 (d,  $J = 3.3$  Hz), 119.55, 115.81 (d,  $J = 21.6$  Hz), 109.44; HRMS (ESI) calcd for  $\text{C}_{16}\text{H}_{13}\text{FN}_3^+$   $[\text{M}+\text{H}]^+$  266.1088; found, 266.1088.



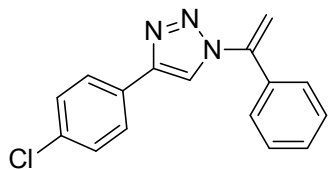

**4-(4-chlorophenyl)-1-(1-phenylvinyl)-1H-1,2,3-triazole (4g)**

Yellow oily liquid; yield, 70% (20.0 mg); IR (neat) 3041,2937,1496,1460,705  $\text{cm}^{-1}$ ;  $^1\text{H}$  NMR (400 MHz,  $\text{CDCl}_3$ )  $\delta$  7.81 – 7.78 (m, 2H), 7.77 (s, 1H), 7.48 – 7.32 (m, 7H), 5.86 (s, 1H), 5.56 (s, 1H);  $^{13}\text{C}$  NMR (100 MHz,  $\text{CDCl}_3$ )  $\delta$  146.47, 142.86, 134.44, 134.09, 129.95, 129.04, 128.88, 127.80, 127.31, 127.02, 119.87, 109.57; HRMS (ESI) calcd for  $\text{C}_{16}\text{H}_{13}\text{ClN}_3^+$   $[\text{M}+\text{H}]^+$  282.0793; found, 282.0792.

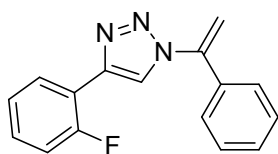

**4-(2-fluorophenyl)-1-(1-phenylvinyl)-1H-1,2,3-triazole (4h)**

Yellow oily liquid; yield, 62% (16.5 mg); IR (neat) 3035, 2931, 1496, 1457, 758  $\text{cm}^{-1}$ ;  $^1\text{H}$  NMR (400 MHz,  $\text{CDCl}_3$ )  $\delta$  8.37 (td,  $J = 7.6, 1.8$  Hz, 1H), 7.99 (d,  $J = 3.6$  Hz, 1H), 7.44 – 7.40 (m, 3H), 7.39 – 7.36 (m, 2H), 7.34 – 7.27 (m, 2H), 7.15 – 7.11 (m, 1H), 5.86 (s, 1H), 5.59 (s, 1H);  $^{13}\text{C}$  NMR (100 MHz,  $\text{CDCl}_3$ )  $\delta$  159.17 (d,  $J = 246.8$  Hz), 142.97, 134.47, 129.89, 129.50 (d,  $J = 8.5$  Hz), 128.83, 127.92 (d,  $J = 3.5$  Hz), 127.24, 124.62 (d,  $J = 3.3$  Hz), 122.92 (d,  $J = 12.8$  Hz), 115.65 (d,  $J = 21.5$  Hz), 109.64; HRMS (ESI) calcd for  $\text{C}_{16}\text{H}_{13}\text{FN}_3^+$   $[\text{M}+\text{H}]^+$  266.1088; found, 266.1084.

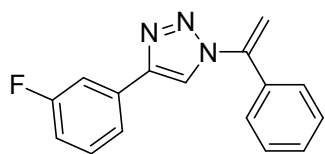

**4-(3-fluorophenyl)-1-(1-phenylvinyl)-1H-1,2,3-triazole (4i)**

Yellow oily liquid; yield, 58% (15.5 mg); IR (neat) 3035, 2931, 1496, 1457, 758  $\text{cm}^{-1}$ ;  $^1\text{H}$  NMR (400 MHz,  $\text{CDCl}_3$ )  $\delta$  7.81 (s, 1H), 7.59 (t,  $J = 10.2$  Hz, 2H), 7.45 – 7.41 (m, 3H), 7.38 (s, 3H), 7.03 (t,  $J = 8.4$  Hz, 1H), 5.87 (s, 1H), 5.57 (s, 1H);  $^{13}\text{C}$  NMR (100 MHz,  $\text{CDCl}_3$ )  $\delta$  163.12 (d,  $J = 244.5$  Hz), 142.85, 134.46, 132.32 (d,  $J = 8.5$  Hz), 130.43 (d,  $J = 8.5$  Hz), 129.97, 128.90, 127.32, 121.37 (d,  $J = 3.0$  Hz), 120.17, 115.14 (d,  $J = 21.1$  Hz), 112.73 (d,  $J = 22.9$  Hz), 109.98, 109.60; HRMS (ESI) calcd for  $\text{C}_{16}\text{H}_{13}\text{FN}_3^+$   $[\text{M}+\text{H}]^+$  266.1088; found, 266.1088.

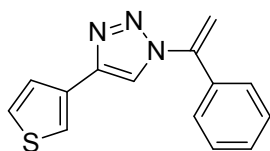

1-(1-phenylvinyl)-4-(thiophen-3-yl)-1H-1,2,3-triazole (**4j**)

Yellow oily liquid; yield, 84% (21.3 mg); IR (neat) 3038, 2934, 1501, 1460, 759  $\text{cm}^{-1}$ ;  $^1\text{H}$  NMR (400 MHz,  $\text{CDCl}_3$ )  $\delta$  7.72 (s, 1H), 7.70 (s, 1H), 7.46 – 7.41 (m, 4H), 7.39 – 7.36 (m, 3H), 5.85 (s, 1H), 5.55 (s, 1H);  $^{13}\text{C}$  NMR (100 MHz,  $\text{CDCl}_3$ )  $\delta$  143.74, 142.87, 134.56, 131.37, 129.87, 128.83, 127.30, 126.39, 125.74, 121.42, 119.57, 109.42; HRMS (ESI) calcd for  $\text{C}_{14}\text{H}_{12}\text{N}_3\text{S}^+ [\text{M}+\text{H}]^+$  254.0746; found, 254.0747.

### 3. References

1. E. J. Yoo, M. Ahlquist, S. H. Kim, I. Bae, V. V. Fokin, K. B. Sharpless, S. Chang, *Angew. Chem. Int. Ed.*, 2007, **46**, 1730.
2. H. F. Duan, W. M. Yan, S. Sengupta and X. D. Shi, *Bioorg. Med. Chem. Lett.*, 2009, **19**, 3899.

## 4. Deuterium-Labeling Experiment Result

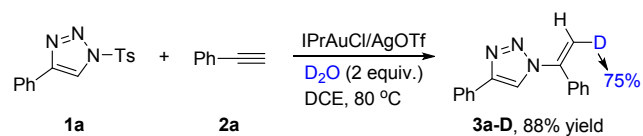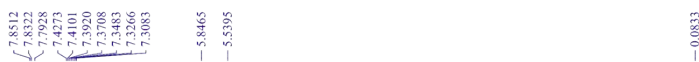

$^1\text{H}$  NMR of **3a**

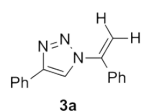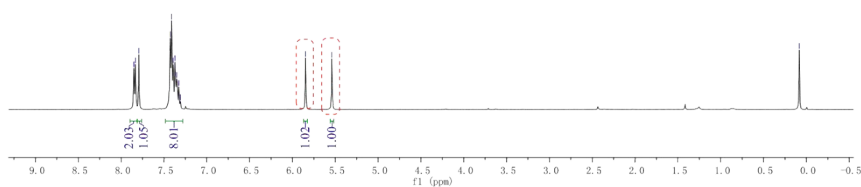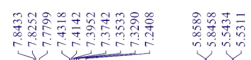

$^1\text{H}$  NMR of **3a-D**

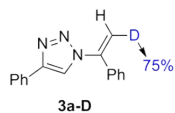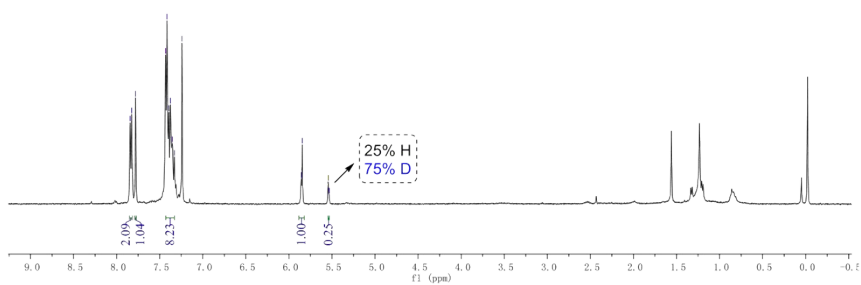

The incorporation of deuterium at the  $\delta = 5.53$  ppm of **3a** is  $(1-0.25)/1 \times 100\% = 75\%$ .

## 5. $^1\text{H}$ and $^{13}\text{C}$ NMR Spectra

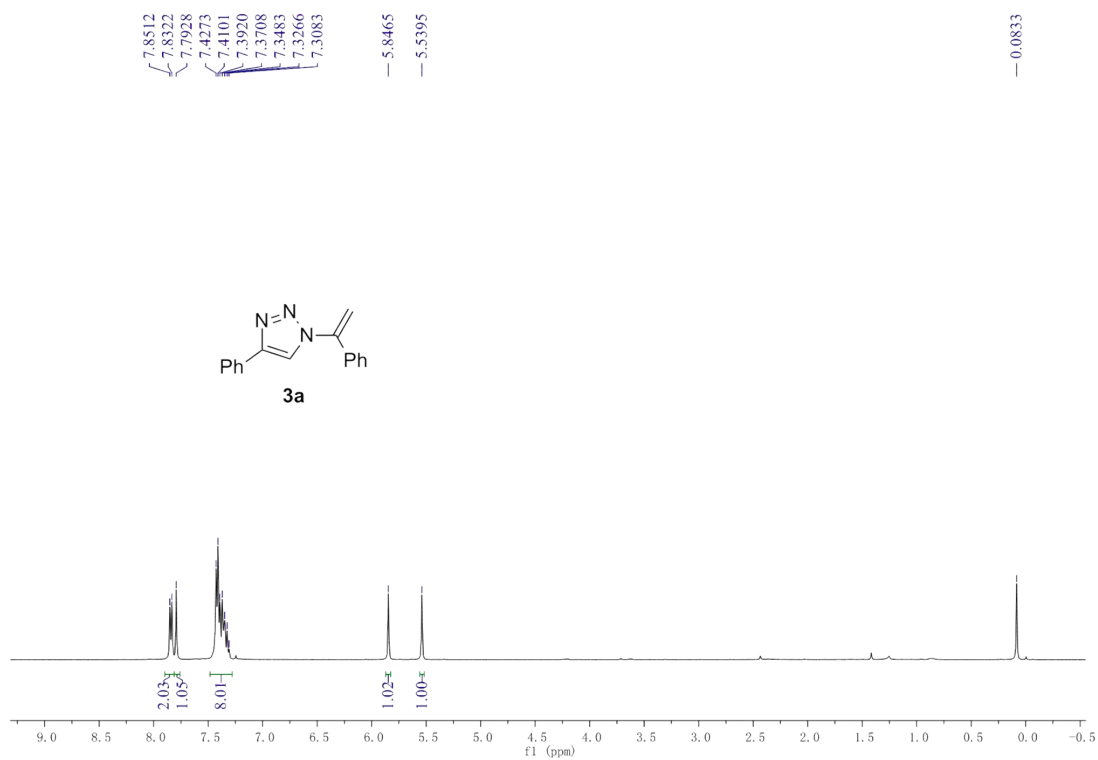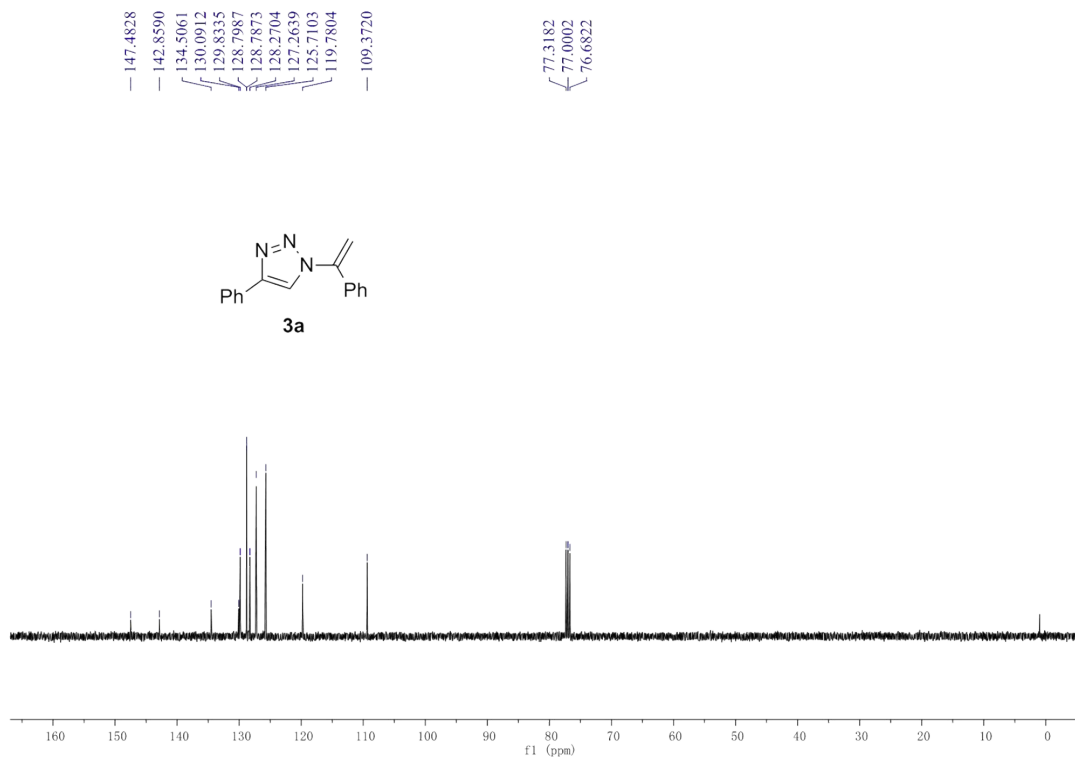

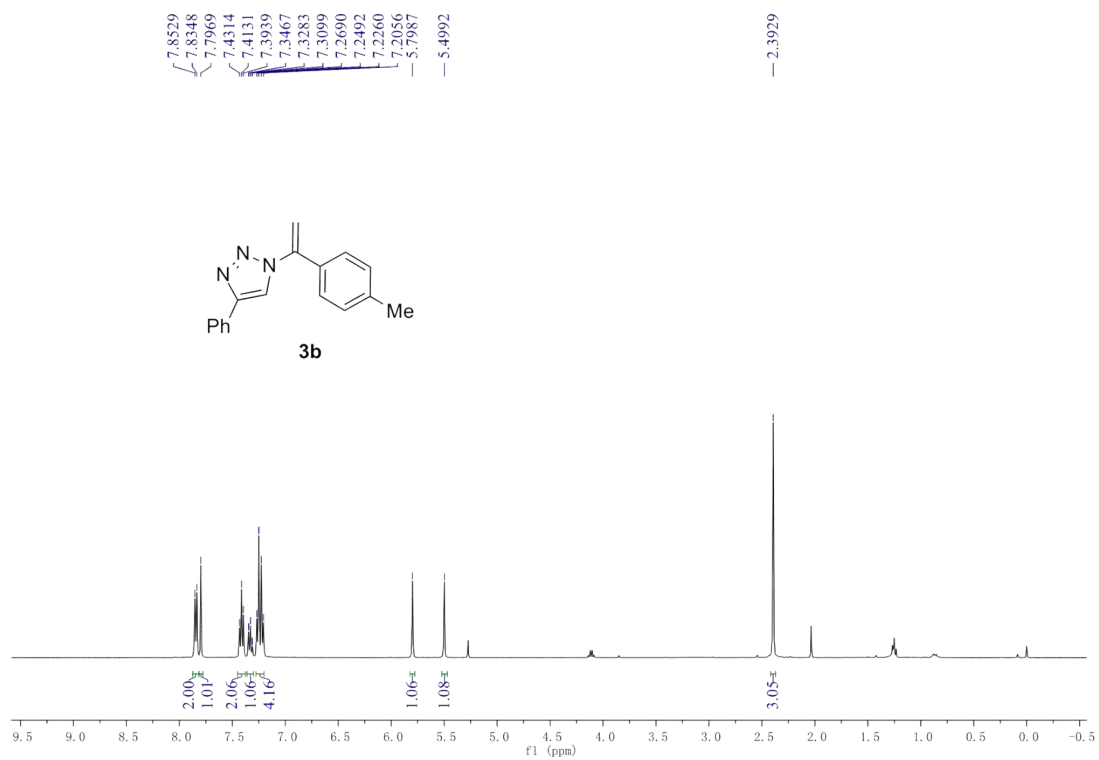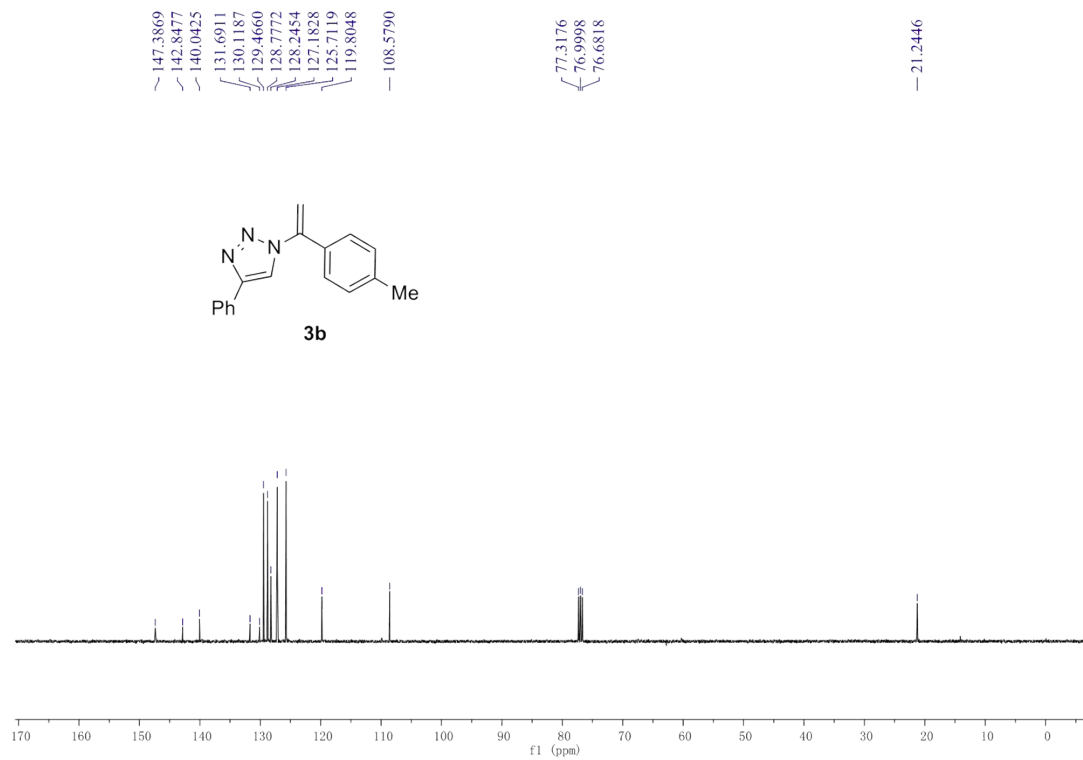

7.8585  
7.8407  
7.8069  
7.4367  
7.4186  
7.3993  
7.3509  
7.3325  
7.2916  
7.2710  
7.2554  
7.2330  
3.8004  
5.5145  
2.6460  
2.6274  
2.6077  
1.7128  
1.6943  
1.6756  
1.6566  
1.6379  
1.6195  
0.9835  
0.9652  
0.9468

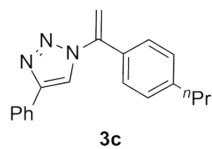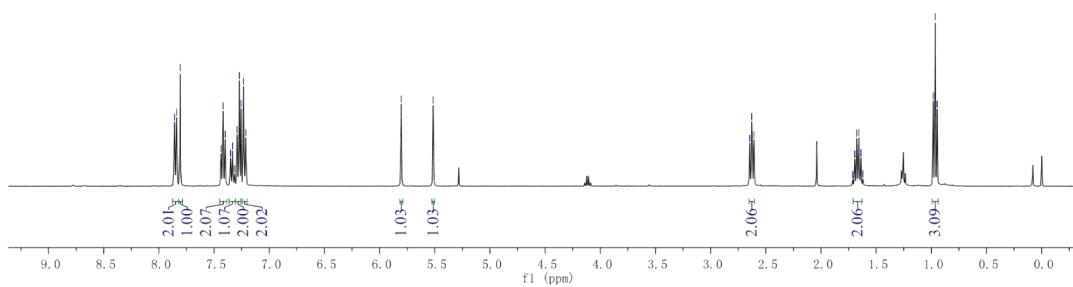

147.4215  
144.8192  
142.9162  
131.9241  
130.1850  
128.8845  
128.7848  
128.2415  
127.1620  
125.7363  
119.8426  
108.6399  
77.3190  
77.0002  
76.6825  
37.7239  
24.3198  
13.7708

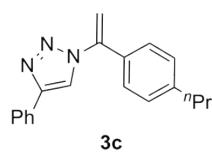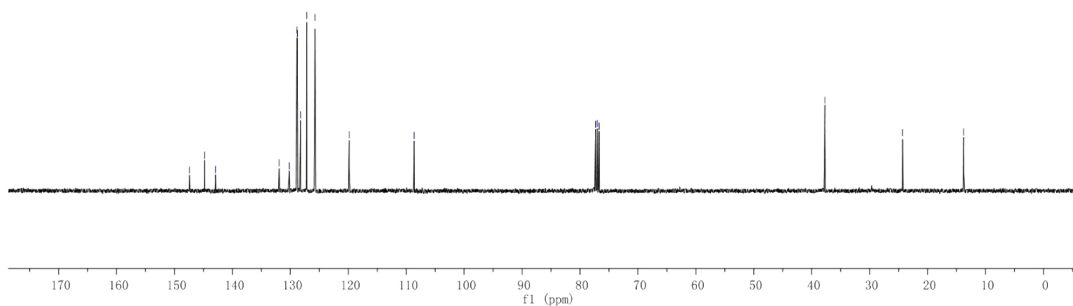

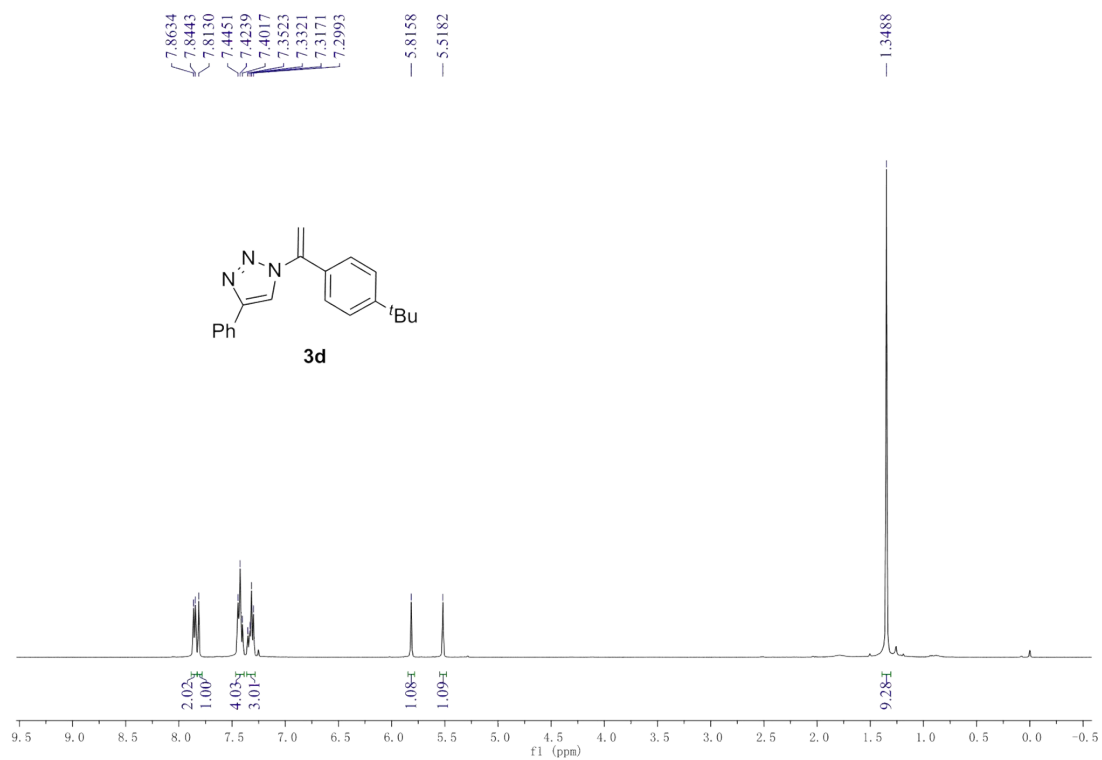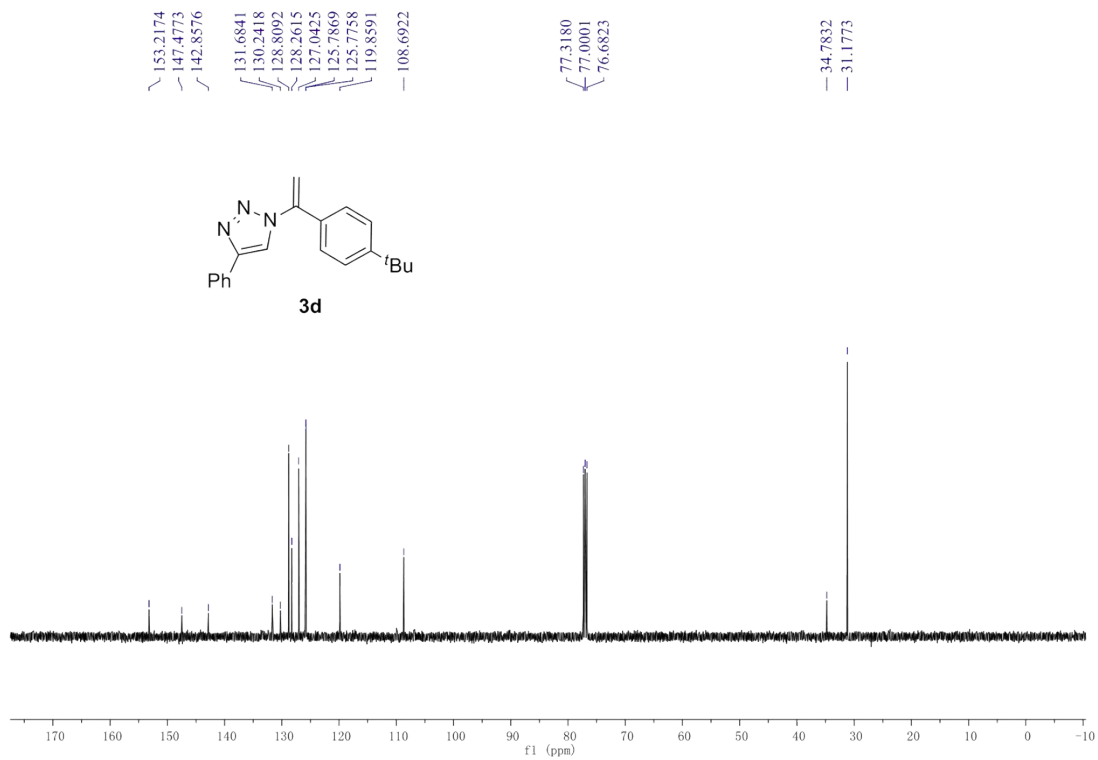

8.0106  
7.8610  
7.8431  
7.4634  
7.4455  
7.4264  
7.4143  
7.3924  
7.3771  
7.2582  
6.9514  
5.8295  
5.3296  
3.8502

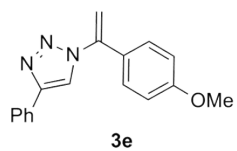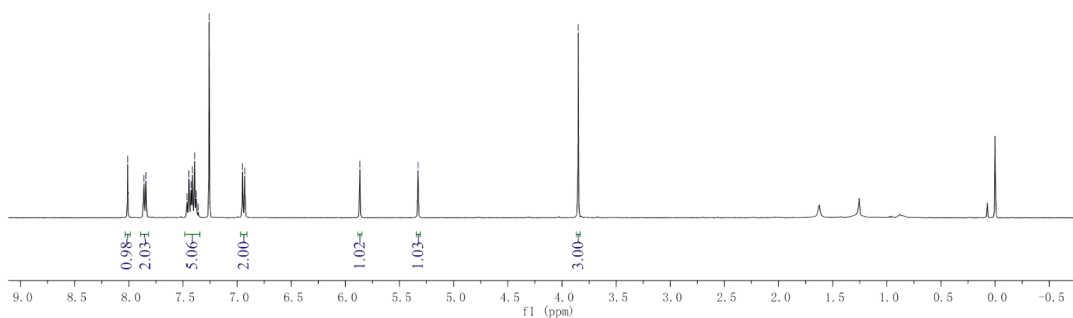

160.3958  
148.5636  
145.7457  
132.3186  
129.9204  
129.6323  
128.8759  
128.8025  
127.1978  
126.1808  
113.7052  
110.0016  
105.9776  
77.3176  
77.0000  
76.6825  
55.3396

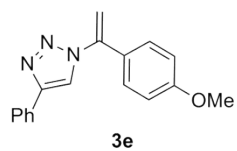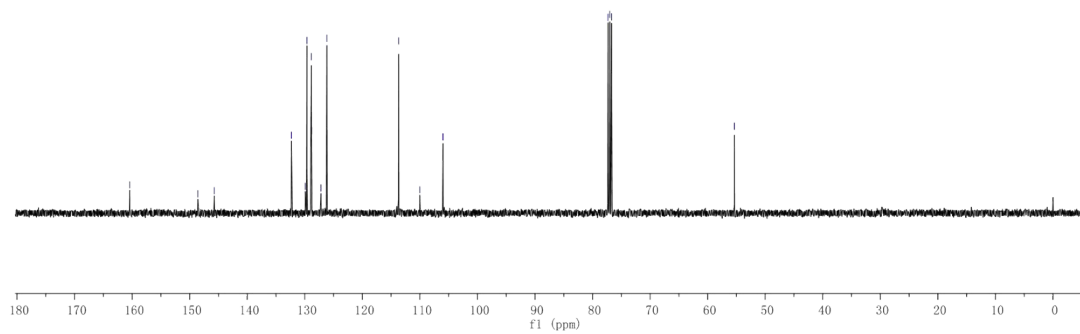



7.8623  
7.8440  
7.8067  
7.4345  
7.4152  
7.3905  
7.3770  
7.3694  
7.3553  
7.2603  
7.1411  
7.1198  
3.8284  
- 5.5153

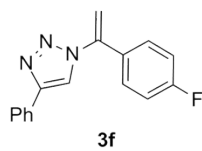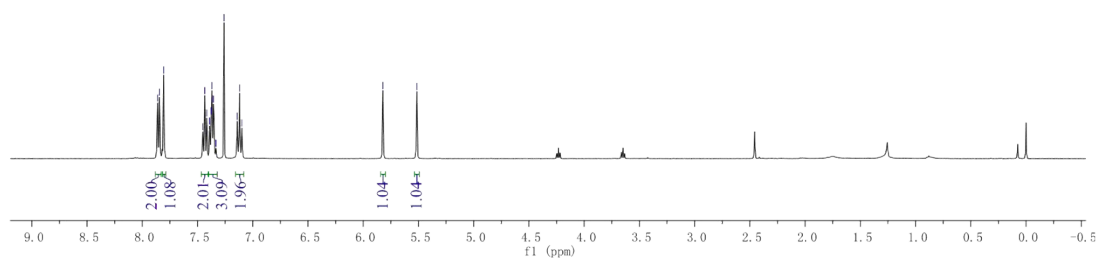

164.7973  
162.3053  
147.6278  
142.0224  
129.9609  
129.9130  
129.3648  
129.2807  
128.8559  
128.4190  
127.9388  
125.7759  
119.6924  
116.0543  
115.8362  
109.2816  
77.3183  
77.0005  
76.6826

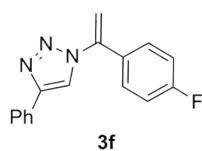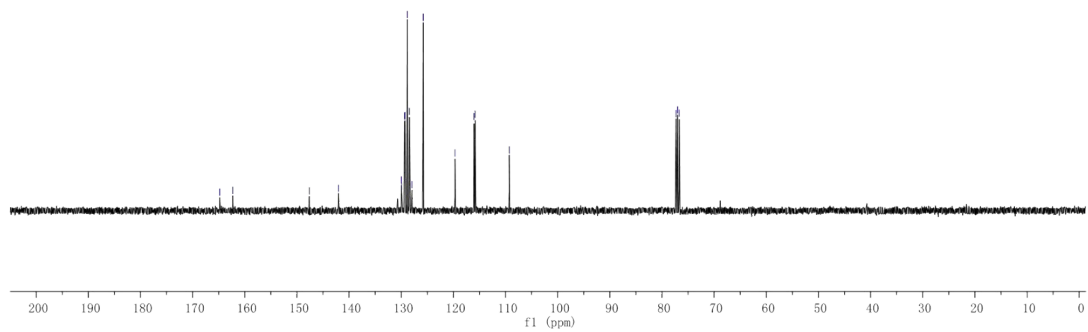

7.8598  
7.8406  
7.8101  
7.4486  
7.4307  
7.4108  
7.3891  
7.3674  
7.3489  
7.3244  
7.3038  
— 5.8384  
— 5.5552

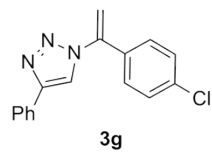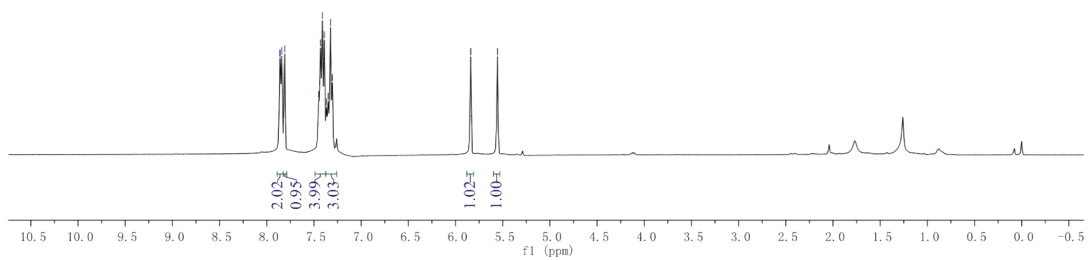

147.7257  
142.0124  
129.9797  
129.1039  
128.8661  
128.6267  
128.4298  
125.7774  
109.7828  
77.3177  
77.0001  
76.6821

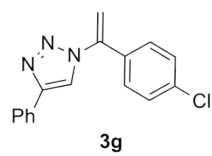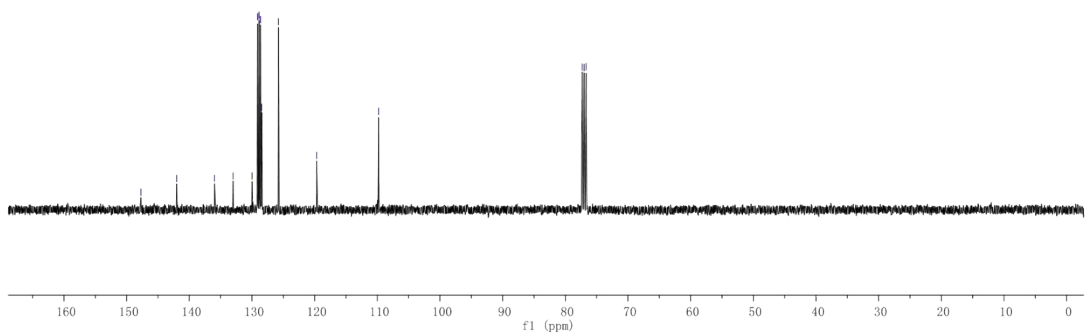

7.8617  
7.8439  
7.8002  
7.5763  
7.5549  
7.4566  
7.4386  
7.4194  
7.3750  
7.3568  
7.3382  
7.2625  
7.2465  
— 5.8562  
— 5.5715

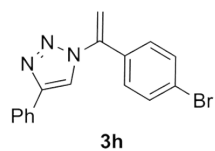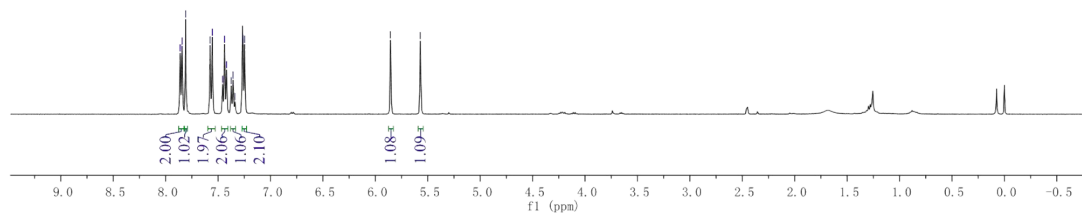

147.7719  
142.0901  
133.4864  
132.0918  
129.9786  
128.8829  
128.4522  
125.7906  
124.2386  
119.6445  
109.9865  
109.8413  
77.3182  
77.0004  
76.6826

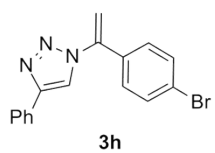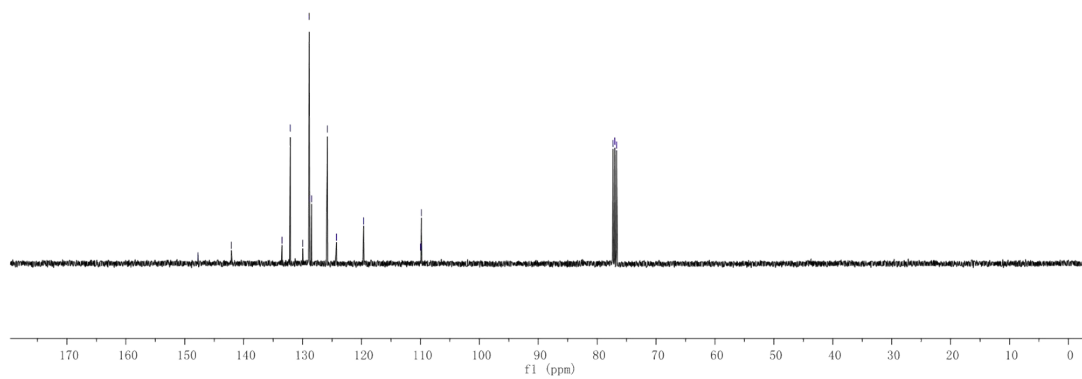

7.9725  
7.8794  
7.8609  
7.4509  
7.4415  
7.4223  
7.3692  
7.3508  
7.3324  
7.2616

5.4692  
5.0105

2.8070  
2.7885  
2.7692  
1.5999  
1.5801  
1.5616  
1.5422  
1.4511  
1.4323  
1.4134  
0.9607  
0.9418  
0.9235

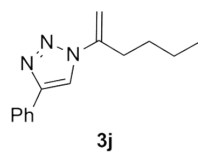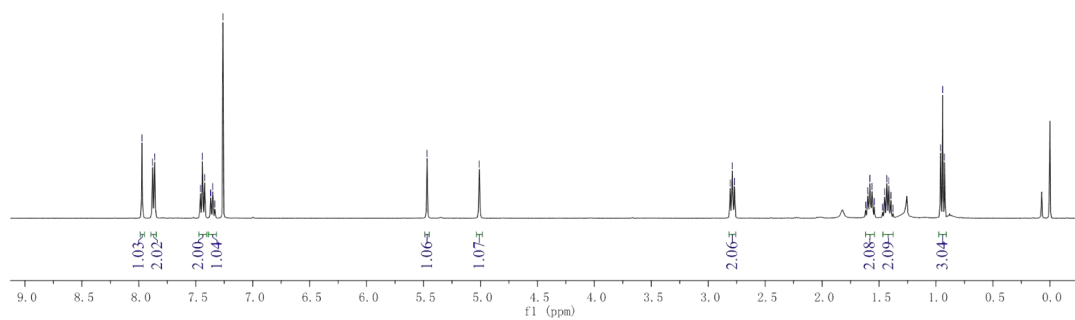

147.4791  
143.8655  
130.2399  
128.8465  
128.3076  
125.7943  
117.2811  
109.9946  
104.0001

77.3174  
76.9996  
76.6817

32.5828  
29.1590  
22.1206  
13.7857

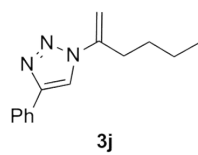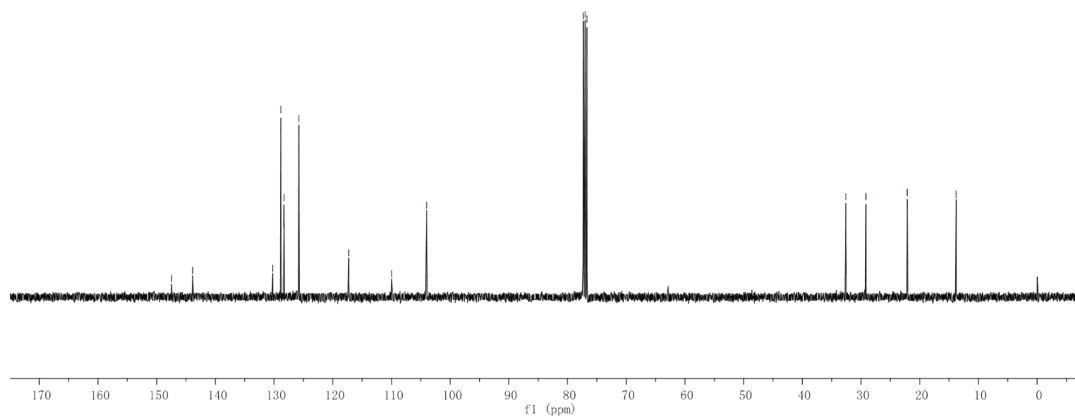

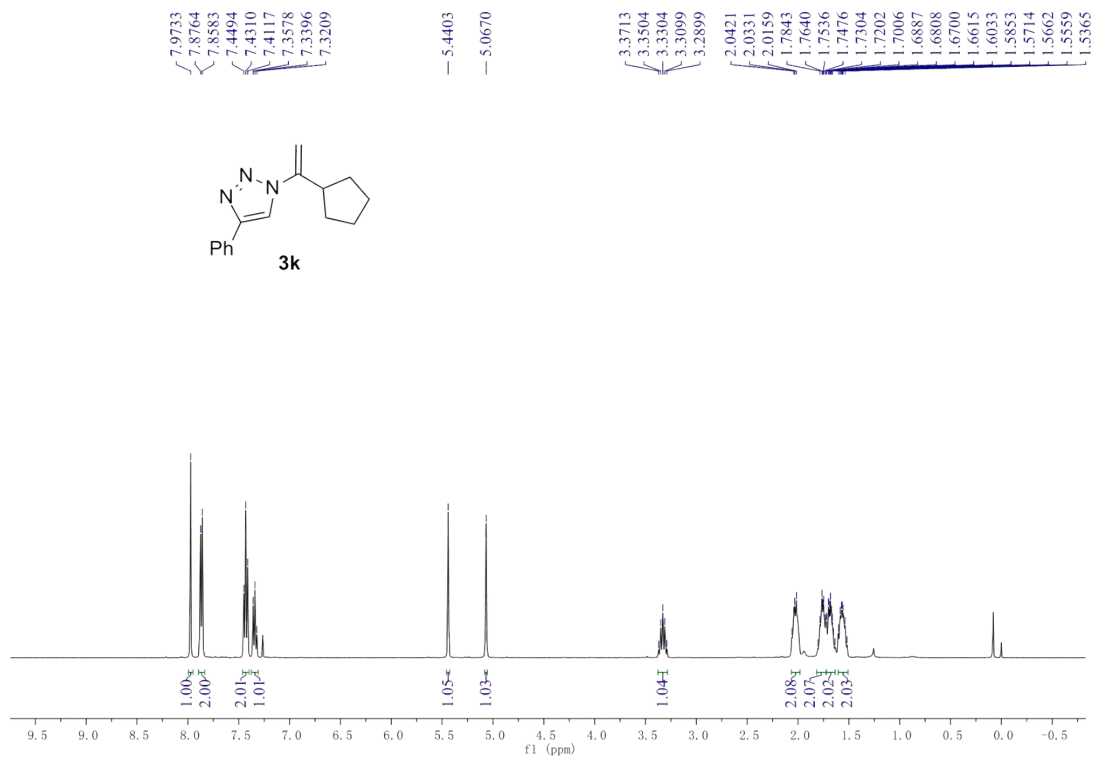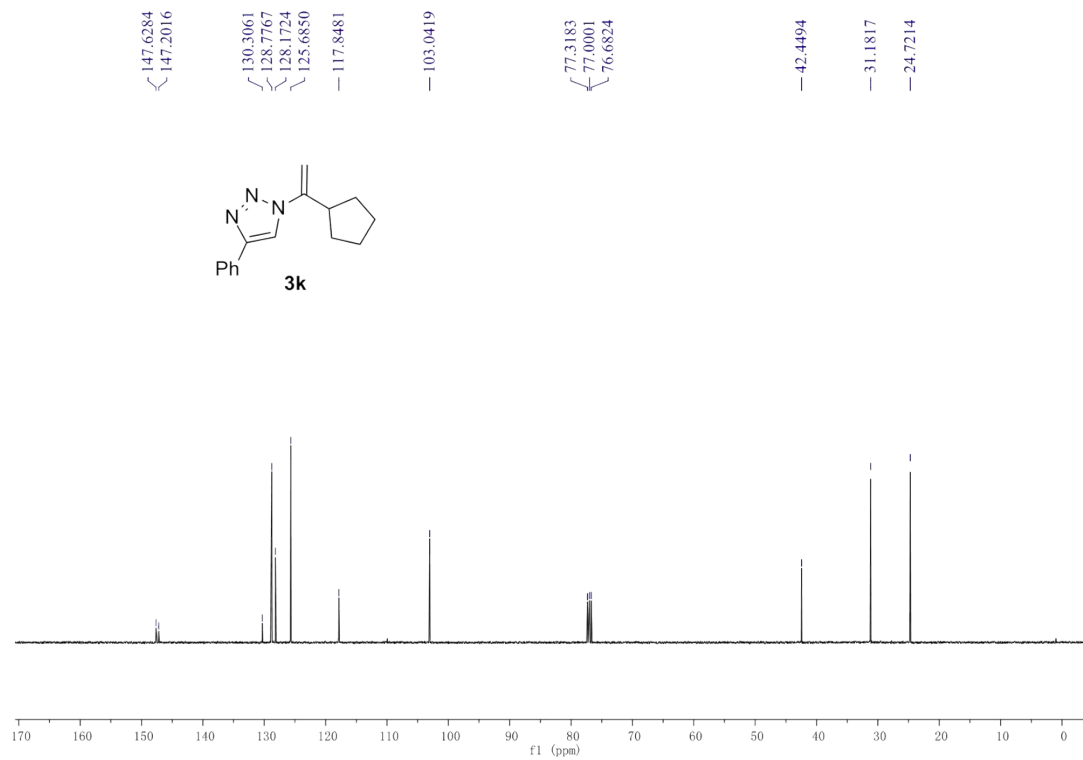

8.0695  
 7.8206  
 7.8035  
 7.3949  
 7.3769  
 7.3590  
 7.3024  
 7.2832  
 7.2660  
 7.1929  
 5.6688  
 4.8913  
 1.8300  
 0.9486  
 0.9293  
 0.7305  
 0.7200

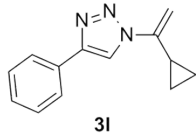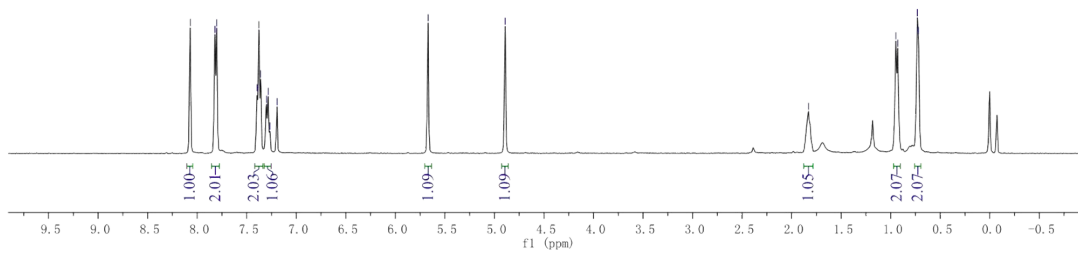

130.3155  
 128.8191  
 128.2165  
 125.7185  
 117.3157  
 109.9711  
 102.9134  
 77.3175  
 76.9996  
 76.6814  
 13.3938  
 6.4422

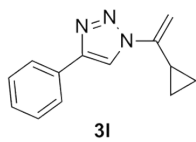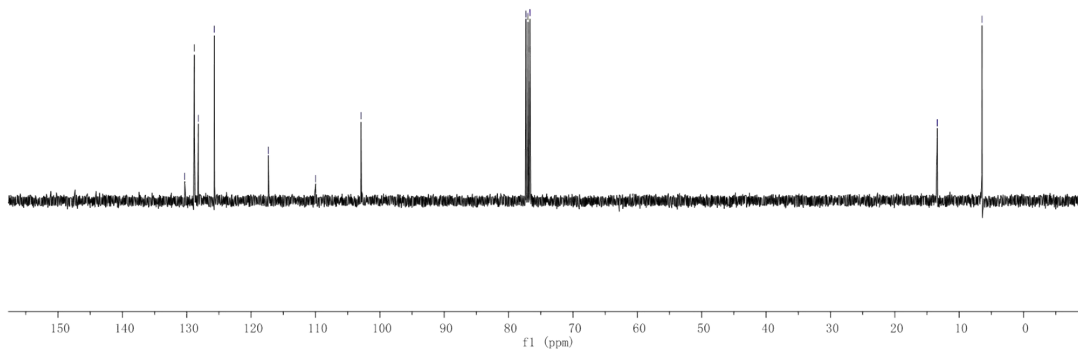

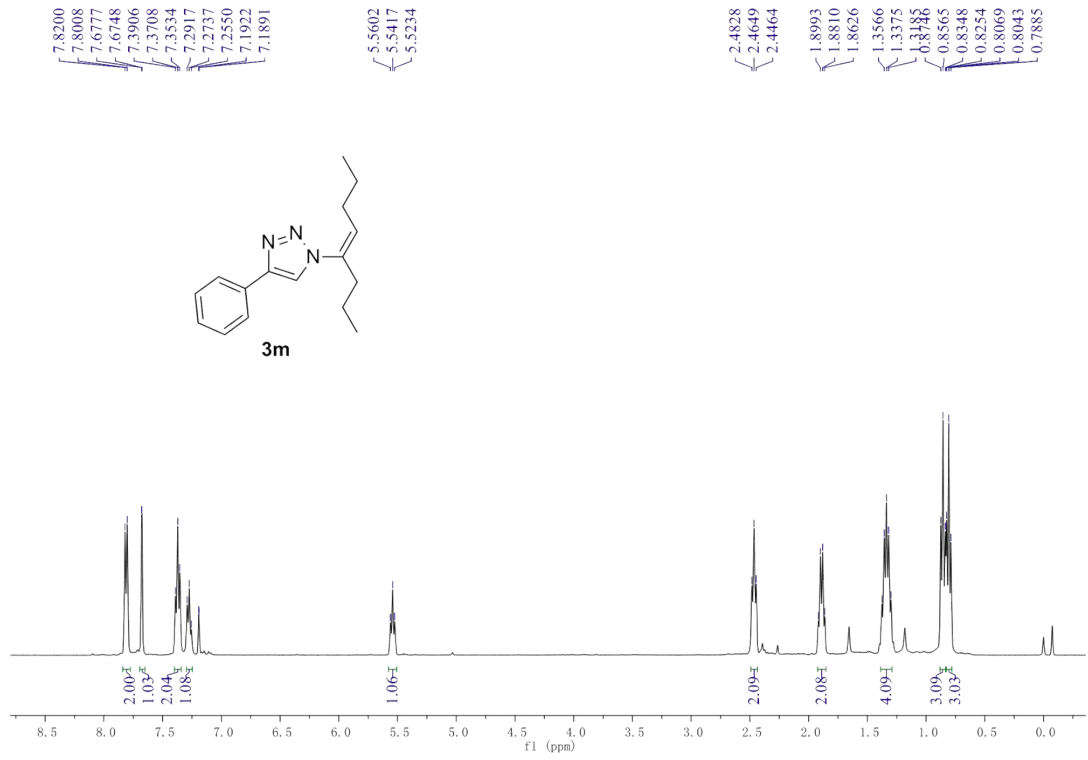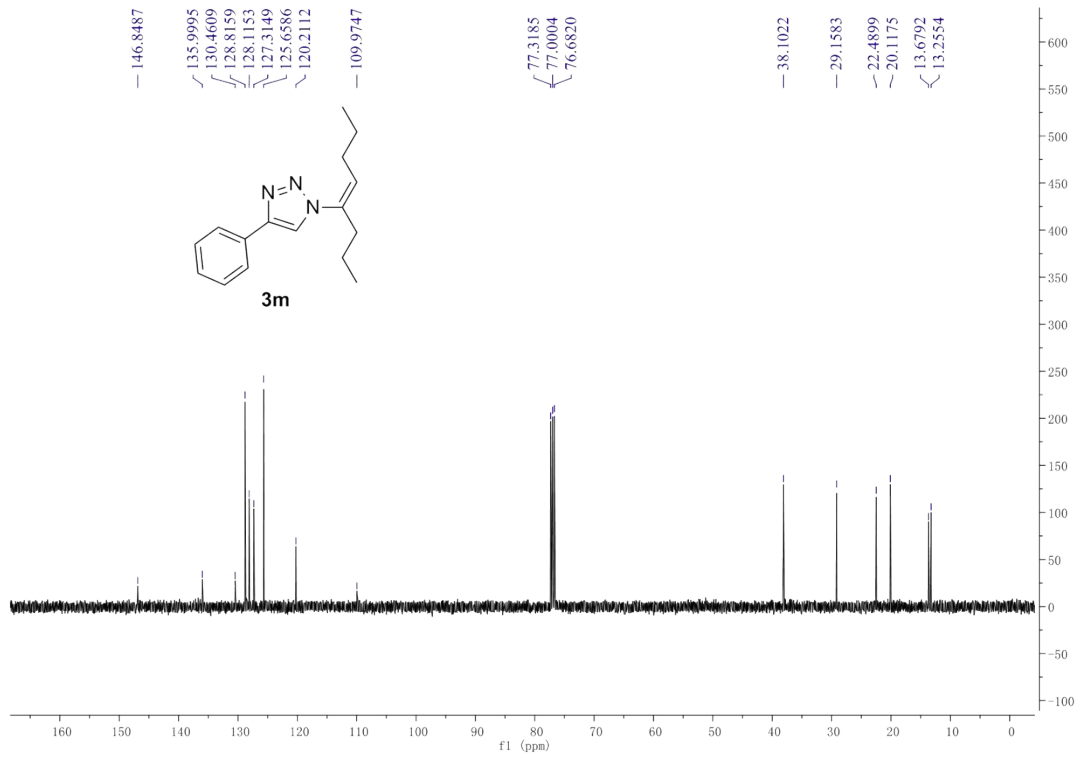

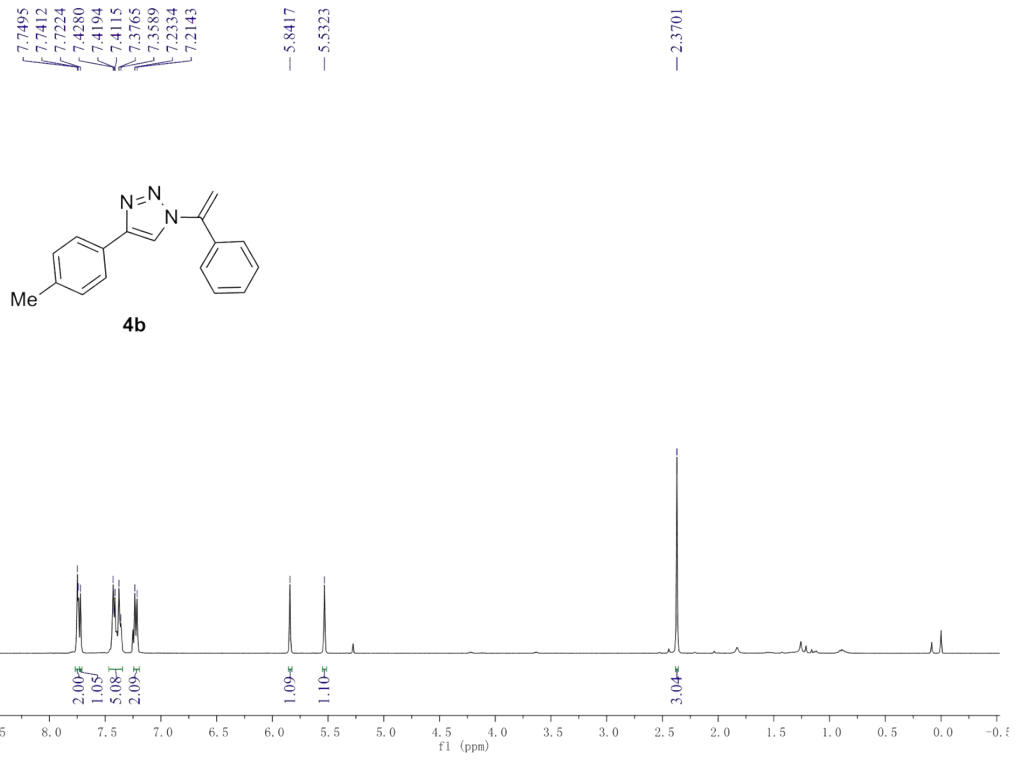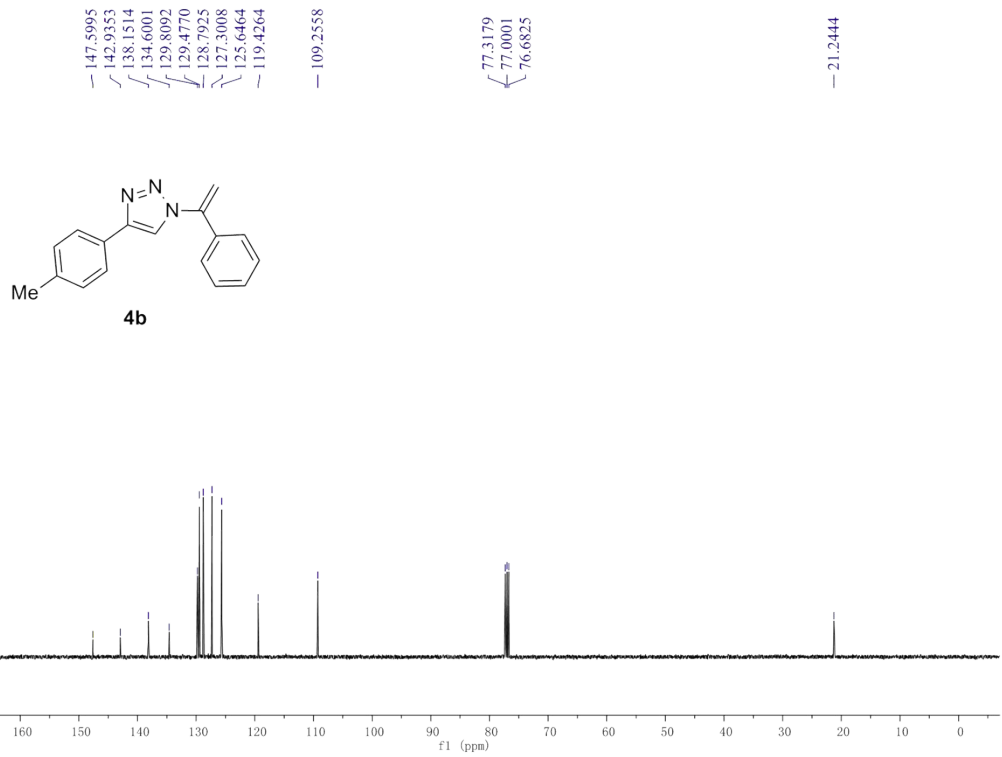



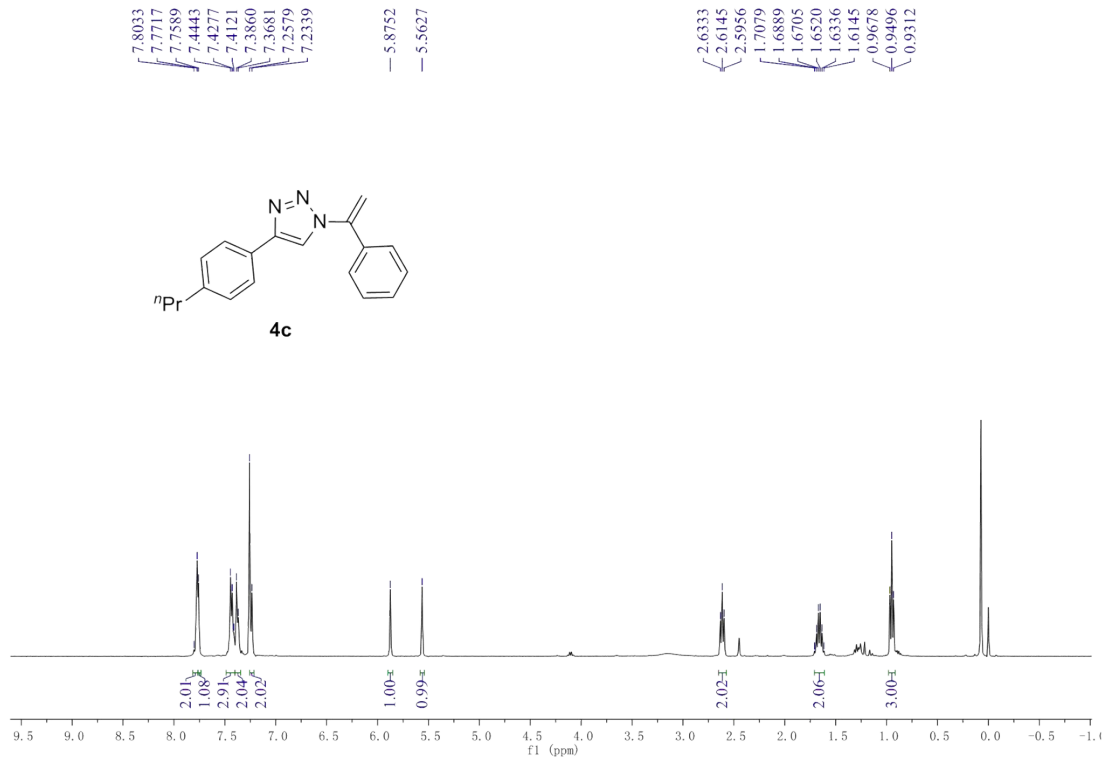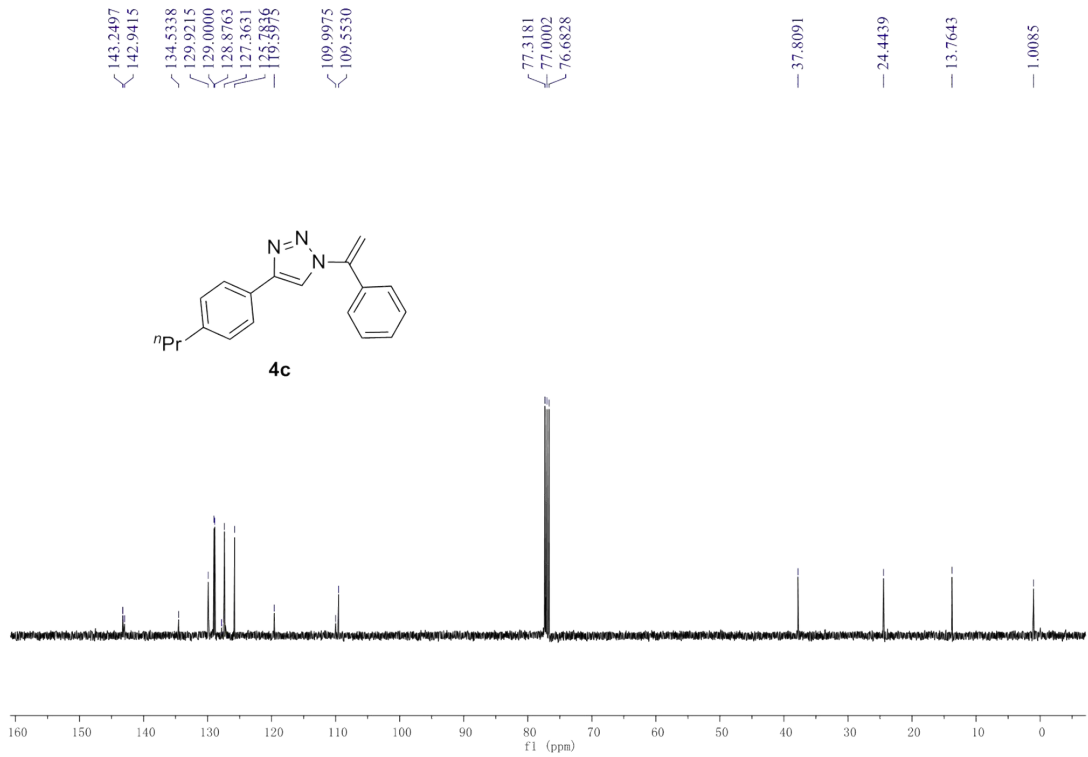

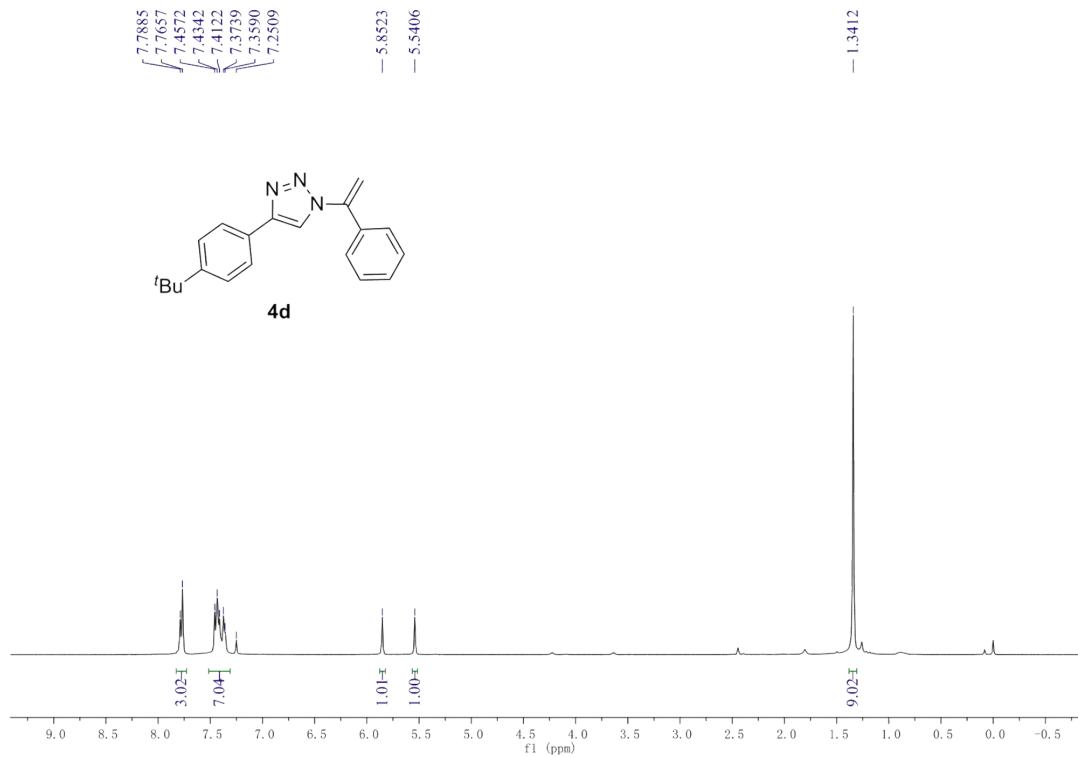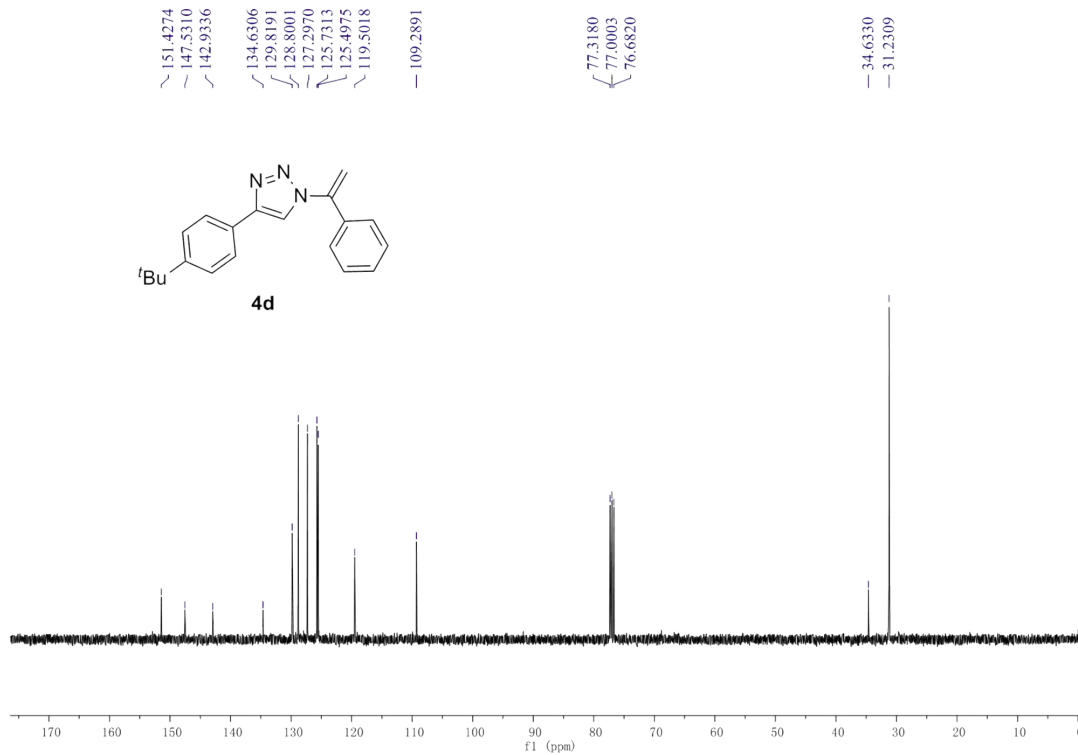

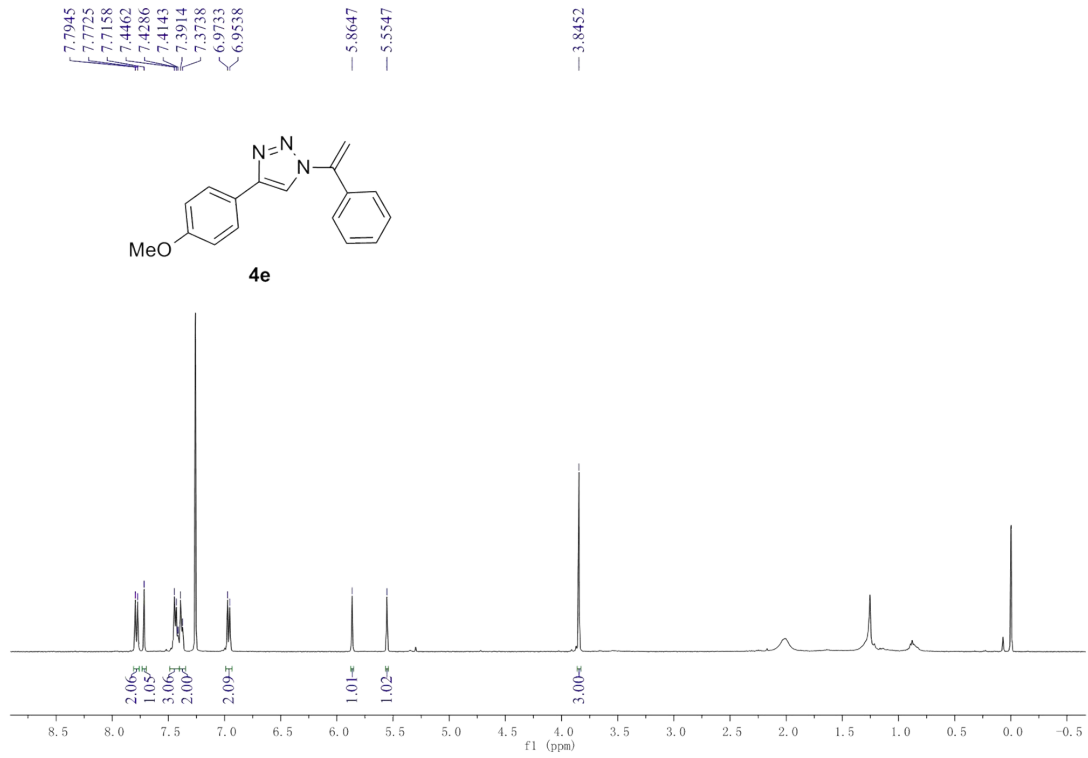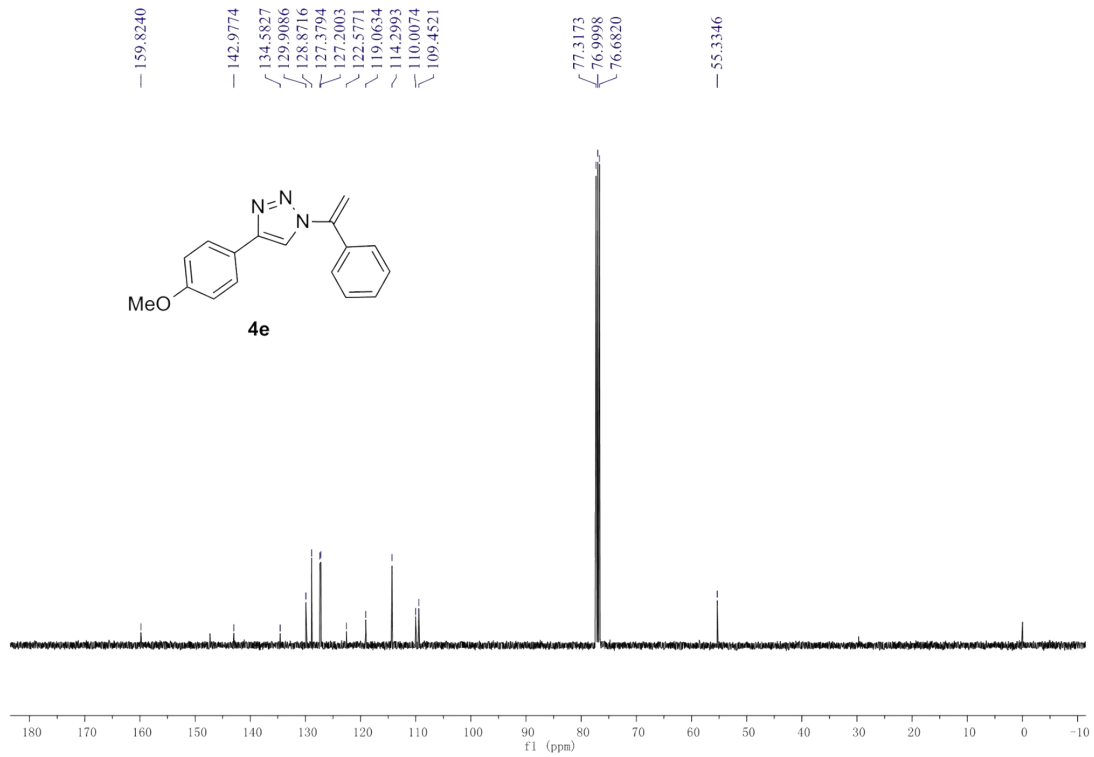

7.8321  
7.8184  
7.7993  
7.7630  
7.4679  
7.4378  
7.4220  
7.4080  
7.3775  
7.3605  
7.1279  
7.1063  
7.0847  
— 5.8499  
— 5.5492

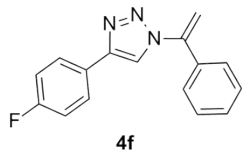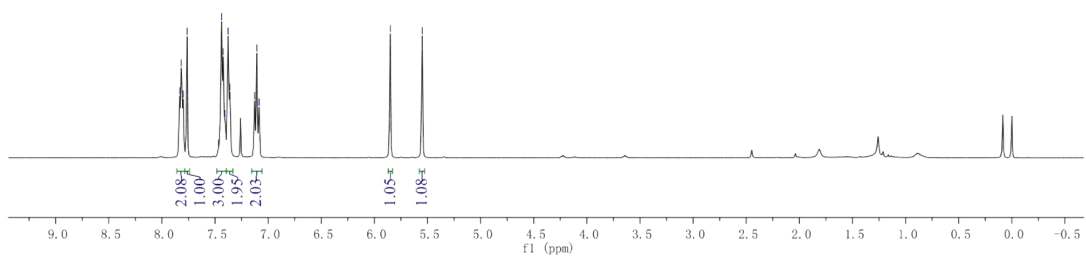

163.9198  
161.4585  
146.6691  
142.8775  
134.4939  
129.8916  
128.8420  
127.5414  
127.4599  
126.3898  
115.9141  
115.6976  
109.4357  
77.3176  
76.9997  
76.6820

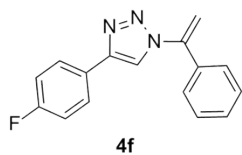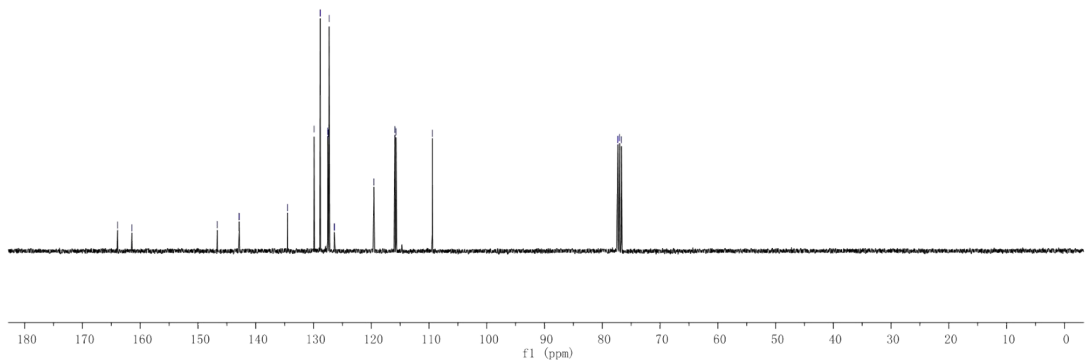

7.7958  
7.7925  
7.7704  
7.4563  
7.4432  
7.4252  
7.4110  
7.3977  
7.3764  
7.3600  
7.3555  
7.3464  
7.2606  
— 5.8586  
— 5.5572

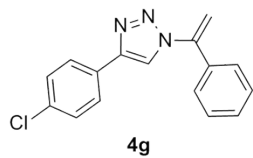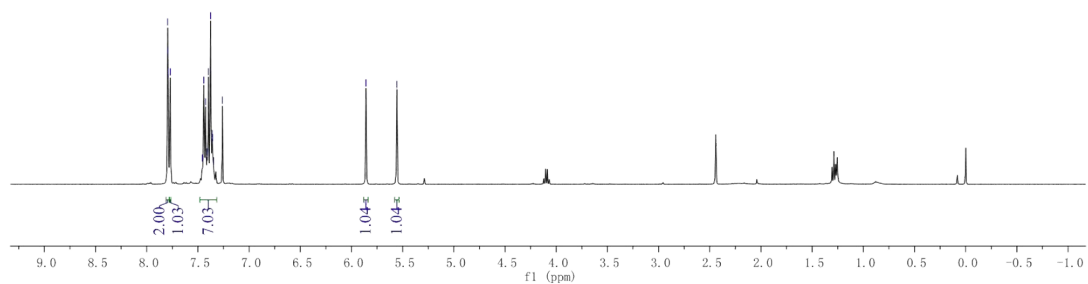

146.4696  
142.8613  
134.4415  
134.0933  
129.9453  
129.0403  
128.8816  
127.7981  
127.3101  
127.0222  
119.8701  
109.5659  
77.3179  
77.0003  
76.6824

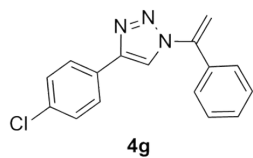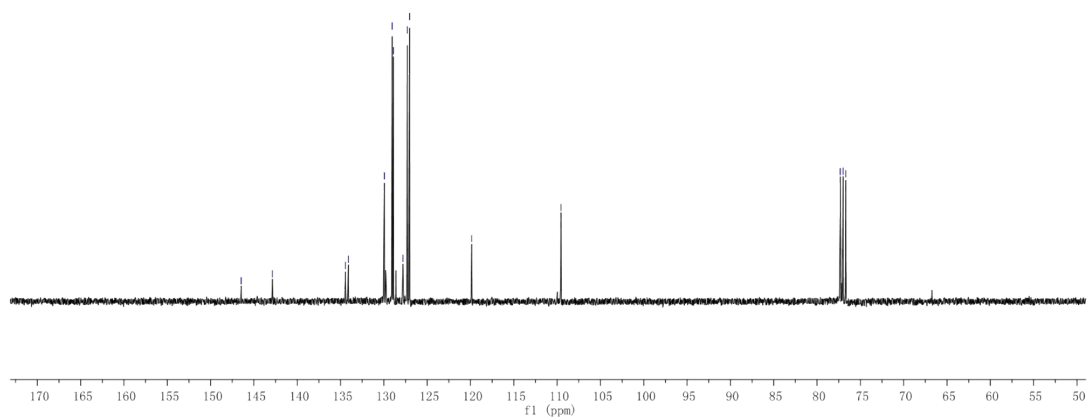

8.3920  
8.3879  
8.3731  
8.3689  
8.3546  
8.3499  
7.9942  
7.9853  
7.4410  
7.4251  
7.3871  
7.3836  
7.3683  
7.2983  
7.2791  
5.8603  
5.5912

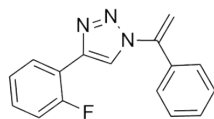

4h

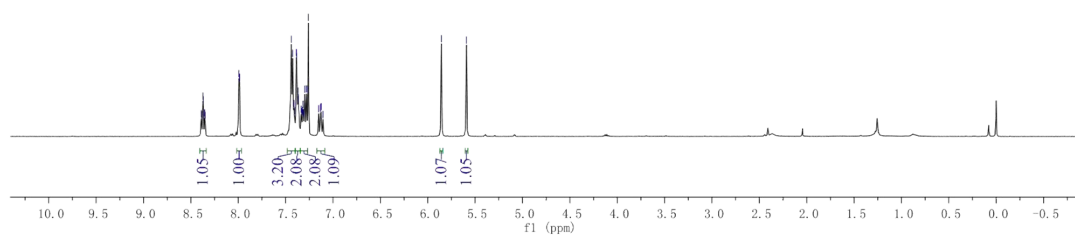

160.4058  
157.9381  
142.9733  
134.4654  
129.8880  
129.5413  
129.4567  
128.8343  
127.9354  
127.9009  
127.2396  
124.6384  
124.6052  
122.9838  
122.8554  
115.7547  
115.5400  
109.6372  
77.3176  
76.9997  
76.6815

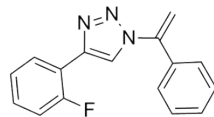

4h

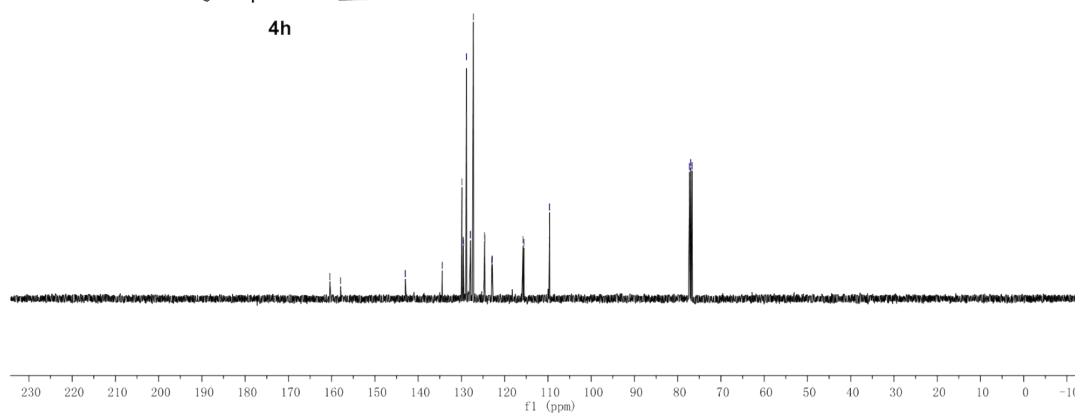

7.8059  
7.6169  
7.5960  
7.5659  
7.4497  
7.4326  
7.4156  
7.4109  
7.3840  
7.0543  
7.0333  
7.0124  
— 5.8739  
— 5.5678

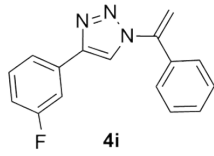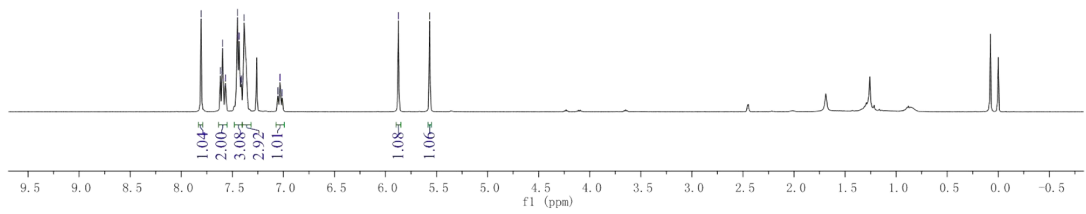

164.3472  
161.9025  
142.8513  
134.4566  
130.4776  
130.3931  
129.9671  
128.9037  
127.3889  
121.3586  
120.1706  
115.2470  
115.0361  
112.8412  
112.6122  
109.9792  
109.6049  
77.3179  
77.0005  
76.6825

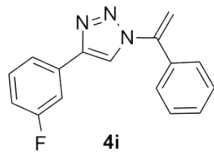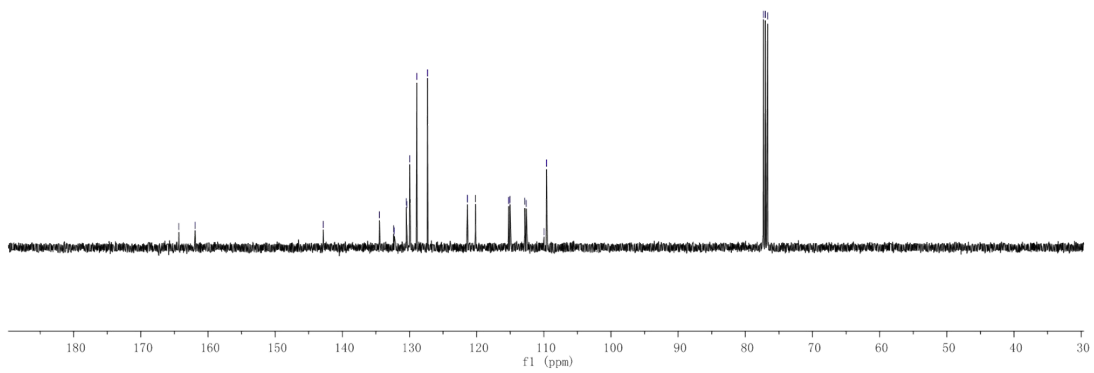

7.7237  
7.6968  
7.4597  
7.4437  
7.4250  
7.4116  
7.3937  
7.3789  
7.3620  
— 5.8521  
— 5.5540

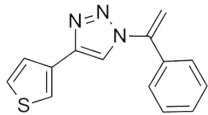

4j

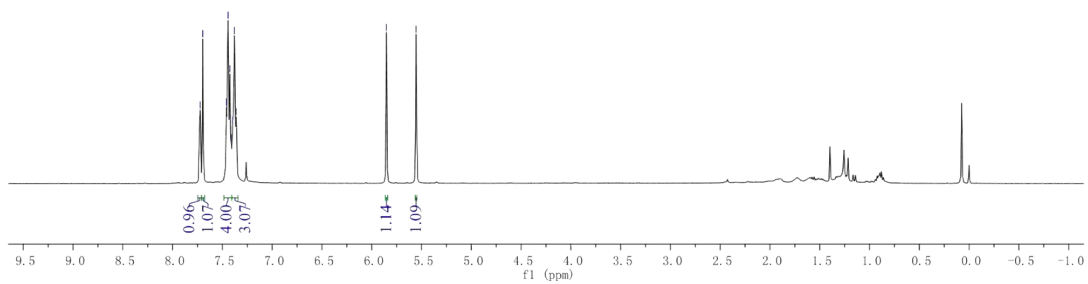

143.7441  
142.8748  
134.5615  
131.3652  
129.8715  
128.8345  
127.3031  
126.3901  
125.7404  
121.4211  
119.5671  
— 109.4235  
77.3176  
76.9995  
76.6819

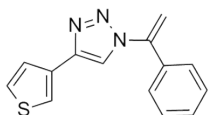

4j

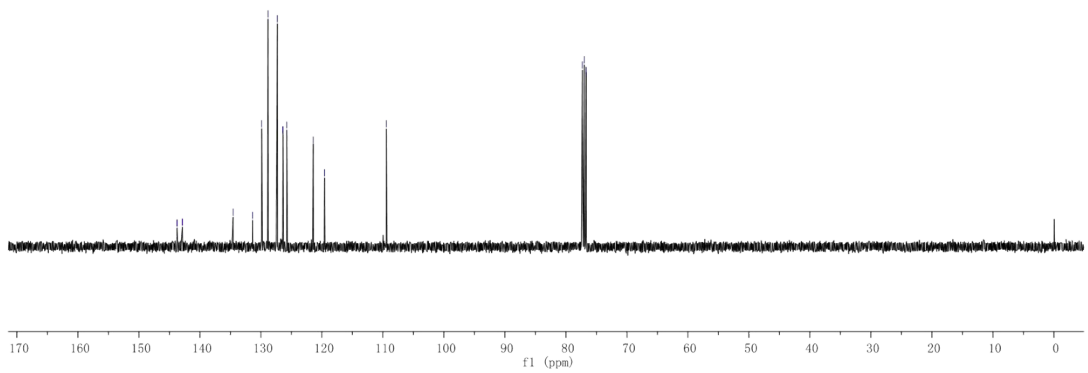

Supplement: c7ob00142h1.pdf [file c7ob00142h1.pdf]
